# Supplementary material
Source: Frontiers journal article supplement (https://www.frontiersin.org/articles/516032)
Supplement: Table_4.xlsx [file Table_4.xlsx]

## Sheet: AusgangTabelle
Table 4: Chl a and POC data in 0-100m, 1991-2015, including station postions.
Date	Long E	Lat N	depth (m)	chlorophyll_a (µg/l)	POC_(µg/L)
1991-06-22	34.052	76.158	0	0.095
1991-06-22	34.052	76.158	20	0.83
1991-06-22	34.052	76.158	40	2.866
1991-06-22	34.052	76.158	52	0.811
1991-06-22	34.052	76.158	60	0.843
1991-06-22	34.052	76.158	70	0.217
1991-06-22	34.052	76.158	100	0.128
1991-06-22	34.458	76.328	0	0.082
1991-06-22	34.458	76.328	20	0.414
1991-06-22	34.458	76.328	40	0.809
1991-06-22	34.458	76.328	60	0.405
1991-06-22	34.458	76.328	70	0.588
1991-06-22	34.458	76.328	100	0.162
1991-06-22	34.842	76.613	0	0.115
1991-06-22	34.842	76.613	10	0.306
1991-06-22	34.842	76.613	20	0.613
1991-06-22	34.842	76.613	30	0.69
1991-06-22	34.842	76.613	40	1.073
1991-06-22	34.842	76.613	50	3.31
1991-06-22	34.842	76.613	60	2.543
1991-06-22	34.842	76.613	80	0.933
1991-06-22	34.842	76.613	100	0.588
1991-06-24	33.05	77.453	0	4
1991-06-24	33.05	77.453	10	3.61
1991-06-24	33.05	77.453	20	3.27
1991-06-24	33.05	77.453	30	1.74
1991-06-24	33.05	77.453	40	1.37
1991-06-24	33.05	77.453	50	0.64
1991-06-24	33.05	77.453	75	0.26
1991-06-24	33.05	77.453	100	0.11
1991-06-25	34.833	76.498	0	0.051
1991-06-25	34.833	76.498	20	0.171
1991-06-25	34.833	76.498	40	0.852
1991-06-25	34.833	76.498	50	4.289
1991-06-25	34.833	76.498	60	2.46
1991-06-25	34.833	76.498	70	1.64
1991-06-25	34.833	76.498	80	1.859
1991-06-25	34.833	76.498	100	0.311
1991-06-25	34.827	75.995	0	0.058
1991-06-25	34.827	75.995	10	0.06
1991-06-25	34.827	75.995	30	0.864
1991-06-25	34.827	75.995	40	2.706
1991-06-25	34.827	75.995	50	2.269
1991-06-25	34.827	75.995	60	0.881
1991-06-25	34.827	75.995	70	0.562
1991-06-25	34.827	75.995	100	0.152
1991-06-25	34.827	75.995	0	0.785
1991-06-25	34.827	75.995	10	1.23
1991-06-25	34.827	75.995	20	1.886
1991-06-25	34.827	75.995	30	0.759
1991-06-25	34.827	75.995	40	2.339
1991-06-25	34.827	75.995	50	0.415
1991-06-25	34.827	75.995	60	0.657
1991-06-25	34.827	75.995	70	0.692
1991-06-25	34.827	75.995	90	0.502
1991-06-25	34.827	75.995	100	0.164
1991-06-27	19.103	77.565	0	0.882
1991-06-27	19.103	77.565	25	1.777
1991-06-27	19.103	77.565	50	0.761
1991-06-27	19.103	77.565	100	0.424
1991-06-27	18.55	77.482	10	0.142
1991-06-27	18.55	77.482	20	0.231
1991-06-27	18.55	77.482	30	0.283
1991-06-27	18.55	77.482	50	1.394
1991-06-27	18.55	77.482	70	1.859
1991-06-27	18.55	77.482	100	2.721
1991-06-27	19.035	77.483	0	0.304
1991-06-27	19.035	77.483	20	0.201
1991-06-27	19.035	77.483	40	4.154
1991-06-27	19.035	77.483	50	2.057
1991-06-27	19.035	77.483	60	0.984
1991-06-27	19.035	77.483	100	0.552
1991-06-27	19.447	77.48	0	0.283
1991-06-27	19.447	77.48	20	0.958
1991-06-27	19.447	77.48	30	0.429
1991-06-27	19.447	77.48	40	0.697
1991-06-27	19.447	77.48	50	4.428
1991-06-27	19.447	77.48	60	1.798
1991-06-27	19.447	77.48	80	0.826
1991-06-27	19.447	77.48	100	1.476
1991-06-28	18.328	77.2	0	0.37
1991-06-28	18.328	77.2	30	0.284
1991-06-28	18.328	77.2	50	0.865
1991-06-28	18.328	77.2	100	0.768
1991-06-28	18.995	77.202	0	0.183
1991-06-28	18.995	77.202	20	0.138
1991-06-28	18.995	77.202	40	0.727
1991-06-28	18.995	77.202	50	2.515
1991-06-28	18.995	77.202	80	1.08
1991-06-28	18.995	77.202	100	0.709
1991-06-28	19.328	77.198	0	0.246
1991-06-28	19.328	77.198	10	0.603
1991-06-28	19.328	77.198	20	0.796
1991-06-28	19.328	77.198	40	1.809
1991-06-28	19.328	77.198	50	0.675
1991-06-28	19.328	77.198	60	0.675
1991-06-28	19.328	77.198	70	0.813
1991-06-28	19.328	77.198	100	0.45
1991-06-28	19.647	77.203	0	0.358
1991-06-28	19.647	77.203	20	1.162
1991-06-28	19.647	77.203	40	1.228
1991-06-28	19.647	77.203	50	4.865
1991-06-28	19.647	77.203	60	1.348
1991-06-28	19.647	77.203	70	0.744
1991-06-28	19.647	77.203	100	0.245
1991-06-28	20.64	76.582	0	4.154
1991-06-28	20.64	76.582	20	1.935
1991-06-28	20.64	76.582	30	1.021
1991-06-28	20.64	76.582	40	1.021
1991-06-28	20.64	76.582	50	0.768
1991-06-28	20.64	76.582	60	0.461
1991-06-28	20.64	76.582	100	0.418
1991-06-29	20.3	76.583	0	1.28
1991-06-29	20.3	76.583	20	1.539
1991-06-29	20.3	76.583	30	0.796
1991-06-29	20.3	76.583	50	0.148
1991-06-29	20.3	76.583	100	0.048
1991-06-29	19.945	76.585	0	1.275
1991-06-29	19.945	76.585	10	2.952
1991-06-29	19.945	76.585	30	2.843
1991-06-29	19.945	76.585	40	0.23
1991-06-29	19.945	76.585	50	0.149
1991-06-29	19.945	76.585	100	0.331
1991-06-29	19.62	76.582	0	0.148
1991-06-29	19.62	76.582	10	0.489
1991-06-29	19.62	76.582	20	1.809
1991-06-29	19.62	76.582	30	0.539
1991-06-29	19.62	76.582	40	0.199
1991-06-29	19.62	76.582	70	0.045
1991-06-29	19.62	76.582	100	0.07
1991-06-29	18.828	76.578	0	0.969
1991-06-29	18.828	76.578	10	0.934
1991-06-29	18.828	76.578	16	1.841
1991-06-29	18.828	76.578	20	1.309
1991-06-29	18.828	76.578	30	0.179
1991-06-29	18.828	76.578	40	0.153
1991-06-29	18.828	76.578	50	0.04
1991-06-29	18.828	76.578	63	0.045
1991-06-29	17.168	75.988	0	3.007
1991-06-29	17.168	75.988	10	2.635
1991-06-29	17.168	75.988	20	2.614
1991-06-29	17.168	75.988	30	2.515
1991-06-29	17.168	75.988	40	1.214
1991-06-29	17.168	75.988	60	0.382
1991-06-29	17.168	75.988	100	0.208
1991-06-29	17.088	76.052	0	0.926
1991-06-29	17.088	76.052	10	0.751
1991-06-29	17.088	76.052	20	0.282
1991-06-29	17.088	76.052	40	0.111
1991-06-29	17.088	76.052	60	0.078
1991-06-29	17.088	76.052	100	0.005
1991-06-30	17.002	76.117	10	1.437
1991-06-30	17.002	76.117	20	1.471
1991-06-30	17.002	76.117	30	1.459
1991-06-30	17.002	76.117	60	0.404
1991-06-30	16.917	76.183	10	2.135
1991-06-30	16.917	76.183	20	1.762
1991-06-30	16.917	76.183	30	0.758
1991-06-30	16.917	76.183	40	0.021
1991-06-30	16.917	76.183	50	0.047
1991-06-30	16.917	76.183	100	0.073
1991-06-30	16.835	76.252	10	1.602
1991-06-30	16.835	76.252	20	3.061
1991-06-30	16.835	76.252	30	1.079
1991-06-30	16.835	76.252	40	0.471
1991-06-30	16.835	76.252	60	0.007
1991-06-30	16.835	76.252	100	0.049
1991-06-30	16.727	76.313	10	1.769
1991-06-30	16.727	76.313	20	1.176
1991-06-30	16.727	76.313	30	0.408
1991-06-30	16.727	76.313	40	0.257
1991-06-30	16.727	76.313	50	0.197
1991-07-01	10.823	78.253	10	1.246
1991-07-01	10.823	78.253	20	0.83
1991-07-01	10.823	78.253	10	0.462
1991-07-01	10.823	78.253	20	0.388
1991-07-01	10.823	78.253	30	0.162
1991-07-01	10.823	78.253	40	0.119
1991-07-01	10.823	78.253	50	0.144
1991-07-01	10.823	78.253	60	0.086
1991-07-01	10.823	78.253	100	0.05
1991-07-02	8.182	79	0	0.475	198.32
1991-07-02	8.182	79	10	0.525
1991-07-02	8.182	79	30	0.138
1991-07-02	8.182	79	50	0.1
1991-07-03	5.995	79.008	10	0.342
1991-07-03	5.995	79.008	20	0.448
1991-07-03	5.995	79.008	30	0.404
1991-07-03	5.995	79.008	40	0.116
1991-07-03	5.995	79.008	50	0.076
1991-07-03	5.995	79.008	75	0.047
1991-07-03	5.995	79.008	100	0.038
1991-07-03	5.995	79.008	0	0.407	125.2
1991-07-03	5.995	79.008	10	0.372
1991-07-03	5.995	79.008	20	0.424	281.11
1991-07-03	5.995	79.008	30	0.372
1991-07-03	5.995	79.008	40	0.265	78.31
1991-07-03	5.995	79.008	60	0.155	74.19
1991-07-03	5.995	79.008	61	7.64
1991-07-03	5.995	79.008	72	11.04	60.6
1991-07-03	5.995	79.008	80	0.101	71.72
1991-07-03	6.715	79.032	0	0.593
1991-07-03	6.715	79.032	10	0.64
1991-07-03	6.715	79.032	20	0.502
1991-07-03	6.715	79.032	30	0.28
1991-07-03	6.715	79.032	40	0.278
1991-07-03	6.715	79.032	75	0.048
1991-07-03	6.715	79.032	100	0.022
1991-07-04	8.16	79.002	10	0.335
1991-07-04	8.16	79.002	20	0.326
1991-07-04	8.16	79.002	30	0.323
1991-07-04	8.16	79.002	40	0.231
1991-07-04	8.16	79.002	50	0.193
1991-07-04	8.16	79.002	75	0.078
1991-07-04	8.16	79.002	100	0.07
1991-07-04	8.592	79.027	0	0.574	154.75
1991-07-04	8.592	79.027	10	0.55	120.34
1991-07-04	8.592	79.027	20	0.502	109.3
1991-07-04	8.592	79.027	40	0.386	110.19
1991-07-04	8.592	79.027	60	0.061	72.93
1991-07-04	8.592	79.027	100	0.022	37.73
1991-07-05	8.592	79.027	0	1.304	181.63
1991-07-05	8.592	79.027	10	1.262
1991-07-05	8.592	79.027	20	1.154	189.67
1991-07-05	8.592	79.027	30	1.28
1991-07-05	8.592	79.027	40	1.086	125.71
1991-07-05	8.592	79.027	60	0.21	77.05
1991-07-05	8.592	79.027	100	0.028	62.74
1991-07-05	10.122	79.017	0	1.338	207.34
1991-07-05	10.122	79.017	10	1.435
1991-07-05	10.122	79.017	20	1.519	203.93
1991-07-05	10.122	79.017	30	1.014
1991-07-05	10.122	79.017	40	0.934	113.09
1991-07-05	10.122	79.017	50	0.367
1991-07-05	10.122	79.017	75	0.063	54.37
1991-07-05	10.122	79.017	100	0.038	56.24
1991-07-06	7.55	80.39	0	0.229
1991-07-06	7.55	80.39	20	0.299
1991-07-06	7.55	80.39	40	0.156
1991-07-06	7.55	80.39	75	0.041
1991-07-06	7.55	80.39	100	0.013
1991-07-06	8.835	80.262	10	0.657
1991-07-06	8.835	80.262	30	0.69
1991-07-06	8.835	80.262	40	0.398
1991-07-06	8.835	80.262	50	0.22
1991-07-06	8.835	80.262	60	0.153
1991-07-06	8.835	80.262	75	0.109
1991-07-06	8.835	80.262	100	0.039
1991-07-07	9.857	80.167	0	0.467
1991-07-07	9.857	80.167	10	0.441
1991-07-07	9.857	80.167	20	0.329
1991-07-07	9.857	80.167	30	0.202
1991-07-07	9.857	80.167	40	0.118
1991-07-07	9.857	80.167	50	0.068
1991-07-07	9.857	80.167	75	0.039
1991-07-07	9.857	80.167	100	0.032
1991-07-08	10.188	80.13	0	0.788
1991-07-08	10.188	80.13	10	0.629
1991-07-08	10.188	80.13	20	0.415
1991-07-08	10.188	80.13	40	0.23
1991-07-08	10.188	80.13	100	0.048
1991-07-08	11.202	79.97	0	1.057
1991-07-08	11.202	79.97	10	1.114
1991-07-08	11.202	79.97	20	0.884
1991-07-08	11.202	79.97	30	0.363
1991-07-08	11.202	79.97	40	0.337
1991-07-08	11.202	79.97	50	0.237
1991-07-08	11.202	79.97	75	0.082
1991-07-08	11.202	79.97	100	0.071
1991-07-09	18.622	80.802	0	0.168
1991-07-09	18.622	80.802	10	0.14
1991-07-09	18.622	80.802	30	0.169
1991-07-09	18.622	80.802	50	0.197
1991-07-09	18.622	80.802	70	0.239
1991-07-09	18.622	80.802	100	0.277
1991-07-09	18.457	81.02	0	0.299	110.94
1991-07-09	18.457	81.02	10	0.309
1991-07-09	18.457	81.02	20	0.303	94.67
1991-07-09	18.457	81.02	30	0.838
1991-07-09	18.457	81.02	40	0.838	107.71
1991-07-09	18.457	81.02	50	0.242
1991-07-09	18.457	81.02	75	0.261	68.58
1991-07-09	18.457	81.02	100	0.185
1991-07-10	18.177	81.19	0	0.148
1991-07-10	18.177	81.19	20	0.128
1991-07-10	18.177	81.19	40	0.115
1991-07-10	18.177	81.19	50	0.109
1991-07-10	18.177	81.19	75	0.039
1991-07-10	18.177	81.19	100	0.021
1991-07-10	17.268	81.46	0	0.502
1991-07-10	17.268	81.46	10	0.467
1991-07-10	17.268	81.46	20	0.398
1991-07-10	17.268	81.46	30	0.381
1991-07-10	17.268	81.46	40	0.175
1991-07-10	17.268	81.46	50	0.131
1991-07-10	17.268	81.46	75	0.029
1991-07-10	17.268	81.46	100	0.021
1991-07-10	16.707	81.507	0	0.633
1991-07-10	16.707	81.507	10	0.441
1991-07-10	16.707	81.507	20	0.355
1991-07-10	16.707	81.507	40	0.226
1991-07-10	16.707	81.507	50	0.491
1991-07-10	16.707	81.507	75	0.049
1991-07-10	16.707	81.507	100	0.017
1991-07-10	15.657	81.56	0	0.398	74.19
1991-07-10	15.657	81.56	10	0.407
1991-07-10	15.657	81.56	20	0.381	65.08
1991-07-10	15.657	81.56	40	0.142
1991-07-10	15.657	81.56	50	0.139	48.67
1991-07-10	15.657	81.56	75	0.05
1991-07-10	15.657	81.56	100	0.01	35.9
1991-07-11	17.472	81.367	0	0.189	47.69
1991-07-11	17.472	81.367	10	0.187
1991-07-11	17.472	81.367	20	0.145
1991-07-11	17.472	81.367	30	0.15
1991-07-11	17.472	81.367	40	0.118	66.99
1991-07-11	17.472	81.367	50	0.075
1991-07-11	17.472	81.367	75	0.034	65.4
1991-07-11	17.472	81.367	100	0.028
1991-07-12	18.623	81.29	0	0.12	64.13
1991-07-12	18.623	81.29	10	0.218
1991-07-12	18.623	81.29	20	0.269	92.18
1991-07-12	18.623	81.29	30	0.294
1991-07-12	18.623	81.29	40	0.243	66.33
1991-07-12	18.623	81.29	50	0.18
1991-07-12	18.623	81.29	75	0.068	60.58
1991-07-12	18.623	81.29	100	0.046	36.97
1991-07-14	31.488	81.443	0	0.441
1991-07-14	31.488	81.443	10	0.337
1991-07-14	31.488	81.443	20	0.193
1991-07-14	31.488	81.443	30	0.127
1991-07-14	31.488	81.443	40	0.159
1991-07-14	31.488	81.443	50	0.145
1991-07-14	31.488	81.443	75	0.064
1991-07-14	31.488	81.443	100	0.038
1991-07-15	30.78	81.432	0	0.349	47.19
1991-07-15	30.78	81.432	10	0.348
1991-07-15	30.78	81.432	20	0.351	65.84
1991-07-15	30.78	81.432	30	0.227
1991-07-15	30.78	81.432	40	0.295	53.34
1991-07-15	30.78	81.432	50	0.202
1991-07-15	30.78	81.432	75	0.123	35.64
1991-07-15	30.78	81.432	100	0.021
1991-07-16	31.167	81.422	0	0.294	49.03
1991-07-16	31.167	81.422	10	0.273
1991-07-16	31.167	81.422	20	0.294	52.73
1991-07-16	31.167	81.422	30	0.213
1991-07-16	31.167	81.422	40	0.149	16.12
1991-07-16	31.167	81.422	50	0.089
1991-07-16	31.167	81.422	75	0.136	22.01
1991-07-16	31.167	81.422	100	0.023	33.96
1991-07-16	29.803	81.68	0	0.202	40.69
1991-07-16	29.803	81.68	10	0.217
1991-07-16	29.803	81.68	20	0.195	47.07
1991-07-16	29.803	81.68	30	0.166
1991-07-16	29.803	81.68	40	0.12	25.66
1991-07-16	29.803	81.68	50	0.09
1991-07-16	29.803	81.68	75	0.051	25.03
1991-07-16	29.803	81.68	100	0.051
1991-07-17	30.492	81.697	10	0.188
1991-07-17	30.492	81.697	20	0.155
1991-07-17	30.492	81.697	30	0.087
1991-07-17	30.492	81.697	50	0.049
1991-07-17	30.492	81.697	75	0.017
1991-07-18	30.55	81.625	0	0.244
1991-07-18	30.55	81.625	20	0.197
1991-07-18	30.55	81.625	40	0.162
1991-07-18	30.55	81.625	75	0.112
1991-07-18	30.55	81.625	100	0.027
1991-07-18	30.777	81.578	0	0.277
1991-07-18	30.777	81.578	0.2	0.242
1991-07-18	30.777	81.578	40	0.167
1991-07-18	30.777	81.578	75	0.053
1991-07-18	30.777	81.578	100	0.014
1991-07-18	30.593	81.535	0	0.303	100.64
1991-07-18	30.593	81.535	20	0.308	113.12
1991-07-18	30.593	81.535	30	0.272
1991-07-18	30.593	81.535	40	0.115	95.12
1991-07-18	30.593	81.535	50	0.112
1991-07-18	30.593	81.535	75	0.098	59.5
1991-07-18	30.593	81.535	100	0.023	60.95
1991-07-19	30.907	81.508	0	0.254
1991-07-19	30.907	81.508	20	0.287
1991-07-19	30.907	81.508	30	0.229
1991-07-19	30.907	81.508	40	0.181
1991-07-19	30.907	81.508	50	0.103
1991-07-19	30.907	81.508	75	0.028
1991-07-19	30.907	81.508	100	0.013
1991-07-19	31.277	81.465	20	0.214
1991-07-19	31.277	81.465	40	0.282
1991-07-19	31.277	81.465	50	0.154
1991-07-19	31.277	81.465	75	0.078
1991-07-19	31.277	81.465	100	0.052
1991-07-19	30.98	81.417	0	0.233
1991-07-19	30.98	81.417	20	0.308
1991-07-19	30.98	81.417	40	0.224
1991-07-19	30.98	81.417	50	0.229
1991-07-19	30.98	81.417	75	0.031
1991-07-19	30.98	81.417	100	0.012
1991-07-20	30.635	80.848	0	0.957
1991-07-20	30.635	80.848	10	0.841
1991-07-20	30.635	80.848	20	1.093
1991-07-20	30.635	80.848	30	0.496
1991-07-20	30.635	80.848	40	0.682
1991-07-20	30.635	80.848	50	0.112
1991-07-20	30.635	80.848	60	0.094
1991-07-20	30.635	80.848	80	0.061
1991-07-20	30.635	80.848	100	0.059
1991-07-20	30.12	80.812	0	3.072
1991-07-20	30.12	80.812	10	2.996
1991-07-20	30.12	80.812	20	1.416
1991-07-20	30.12	80.812	30	0.701
1991-07-20	30.12	80.812	40	0.413
1991-07-20	30.12	80.812	50	0.299
1991-07-20	30.12	80.812	75	0.164
1991-07-20	30.12	80.812	100	0.062
1991-07-20	29.473	80.747	0	4.395
1991-07-20	29.473	80.747	5	4.373
1991-07-20	29.473	80.747	10	3.477
1991-07-20	29.473	80.747	20	3.411
1991-07-20	29.473	80.747	30	2.711
1991-07-20	29.473	80.747	40	0.848
1991-07-20	29.473	80.747	50	0.314
1991-07-20	29.473	80.747	75	0.138
1991-07-20	29.473	80.747	100	0.09
1991-07-21	28.56	80.698	0	0.225
1991-07-21	28.56	80.698	10	0.227
1991-07-21	28.56	80.698	20	0.233
1991-07-21	28.56	80.698	30	0.223
1991-07-21	28.56	80.698	40	0.2
1991-07-21	28.56	80.698	50	0.14
1991-07-21	28.56	80.698	75	0.083
1991-07-21	28.56	80.698	100	0.035
1991-07-22	28.672	80.372	0	2.318
1991-07-22	28.672	80.372	10	1.946
1991-07-22	28.672	80.372	15	1.079
1991-07-22	28.672	80.372	20	1.212
1991-07-22	28.672	80.372	30	1.101
1991-07-22	28.672	80.372	40	1.039
1991-07-22	28.672	80.372	60	0.934
1991-07-22	28.672	80.372	100	0.865
1991-07-22	29.2703	80.3312	0	3.367	311.07
1991-07-22	29.2703	80.3312	10	2.864
1991-07-22	29.2703	80.3312	15	2.722	224.3
1991-07-22	29.2703	80.3312	20	0.633
1991-07-22	29.2703	80.3312	30	0.851	89.47
1991-07-22	29.2703	80.3312	40	0.778
1991-07-22	29.2703	80.3312	50	0.527	95.83
1991-07-22	29.2703	80.3312	60	0.234
1991-07-22	29.2703	80.3312	80	0.169	53.52
1991-07-22	29.2703	80.3312	100	0.173	47.72
1991-07-22	29.1447	80.3383	0	1.45	104.66
1991-07-22	29.1447	80.3383	10	1.021
1991-07-22	29.1447	80.3383	15	1.021	76.38
1991-07-22	29.1447	80.3383	20	1.176
1991-07-22	29.1447	80.3383	30	1.021	84.98
1991-07-22	29.1447	80.3383	40	0.675
1991-07-22	29.1447	80.3383	50	0.418	95.08
1991-07-22	29.1447	80.3383	60	0.282
1991-07-22	29.1447	80.3383	80	0.164	80.58
1991-07-22	29.1447	80.3383	100	0.159	31.22
1991-07-23	29.1333	80.355	0	2.197	170.79
1991-07-23	29.1333	80.355	10	1.515
1991-07-23	29.1333	80.355	20	1.003	93.93
1991-07-23	29.1333	80.355	30	0.657
1991-07-23	29.1333	80.355	40	0.432	55.88
1991-07-23	29.1333	80.355	50	0.347
1991-07-23	29.1333	80.355	60	0.315	59.85
1991-07-23	29.1333	80.355	80	0.208
1991-07-23	29.1333	80.355	100	0.164	44.05
1991-07-23	29.632	80.1	0	0.469	212.93
1991-07-23	29.632	80.1	10	1.295
1991-07-23	29.632	80.1	20	3.061
1991-07-23	29.632	80.1	25	4.428	319.05
1991-07-23	29.632	80.1	30	4.799
1991-07-23	29.632	80.1	40	1.038
1991-07-23	29.632	80.1	50	0.414	102.69
1991-07-23	29.632	80.1	60	0.154
1991-07-23	29.632	80.1	100	0.154	49.1
1991-07-23	29.992	79.837	0	0.182
1991-07-23	29.992	79.837	20	0.219
1991-07-23	29.992	79.837	30	0.256
1991-07-23	29.992	79.837	40	0.313
1991-07-23	29.992	79.837	50	0.405
1991-07-23	29.992	79.837	75	0.258
1991-07-23	29.992	79.837	100	0.001
1991-07-23	30.22	79.667	0	0.204
1991-07-23	30.22	79.667	20	0.498
1991-07-23	30.22	79.667	40	0.443
1991-07-23	30.22	79.667	75	0.108
1991-07-23	30.22	79.667	100	0.028
1991-07-23	30.497	79.513	0	0.332	112.96
1991-07-23	30.497	79.513	10	0.398	119.37
1991-07-23	30.497	79.513	20	0.477
1991-07-23	30.497	79.513	30	0.157
1991-07-23	30.497	79.513	40	0.403	112.17
1991-07-23	30.497	79.513	50	0.211
1991-07-23	30.497	79.513	70	0.141	69.11
1991-07-24	30.503	79.447	0	0.257
1991-07-24	30.503	79.447	20	0.552
1991-07-24	30.503	79.447	30	1.208
1991-07-24	30.503	79.447	40	0.667
1991-07-24	30.503	79.447	50	0.438
1991-07-24	30.503	79.447	75	0.031
1991-07-24	30.503	79.447	100	0.258
1991-07-24	31.708	79.182	0	1.315
1991-07-24	31.708	79.182	10	1.634
1991-07-24	31.708	79.182	20	4.133
1991-07-24	31.708	79.182	30	0.671
1991-07-24	31.708	79.182	40	0.35
1991-07-24	31.708	79.182	50	0.276
1991-07-24	31.708	79.182	60	0.273
1991-07-24	31.997	78.848	0	0.623
1991-07-24	31.997	78.848	10	1.371
1991-07-24	31.997	78.848	20	1.357
1991-07-24	31.997	78.848	30	1.332
1991-07-24	31.997	78.848	40	0.284
1991-07-24	31.997	78.848	50	0.173
1991-07-24	31.997	78.848	75	0.206
1991-07-24	31.997	78.848	100	0.027
1991-07-24	32.163	78.652	0	0.312
1991-07-24	32.163	78.652	10	0.542
1991-07-24	32.163	78.652	20	0.587
1991-07-24	32.163	78.652	30	3.149
1991-07-24	32.163	78.652	40	3.706
1991-07-24	32.163	78.652	50	2.679
1991-07-24	32.163	78.652	75	0.25
1991-07-24	32.163	78.652	100	0.042
1991-07-25	32.563	78.317	0	0.221
1991-07-25	32.563	78.317	10	0.53
1991-07-25	32.563	78.317	20	1.397
1991-07-25	32.563	78.317	35	0.678
1991-07-25	32.563	78.317	40	2.307
1991-07-25	32.563	78.317	50	0.972
1991-07-25	32.563	78.317	60	0.702
1991-07-25	32.563	78.317	75	0.3
1991-07-25	32.563	78.317	100	0.06
1991-07-25	32.91	77.992	0	0.323
1991-07-25	32.91	77.992	10	0.513
1991-07-25	32.91	77.992	20	2.515
1991-07-25	32.91	77.992	30	1.062
1991-07-25	32.91	77.992	40	1.564
1991-07-25	32.91	77.992	50	0.306
1991-07-25	32.91	77.992	75	0.271
1991-07-25	32.91	77.992	100	0.165
1991-07-25	33.047	77.753	10	0.879
1991-07-25	33.047	77.753	20	1.608
1991-07-25	33.047	77.753	30	1.568
1991-07-25	33.047	77.753	35	2.416
1991-07-25	33.047	77.753	40	2.602
1991-07-25	33.047	77.753	50	1.596
1991-07-25	33.047	77.753	60	0.983
1991-07-25	33.047	77.753	100	0.243
1991-07-25	33.037	77.453	0	0.327
1991-07-25	33.037	77.453	10	0.524
1991-07-25	33.037	77.453	20	1.33
1991-07-25	33.037	77.453	33	2.952
1991-07-25	33.037	77.453	40	4.176
1991-07-25	33.037	77.453	50	1.884
1991-07-25	33.037	77.453	60	1.102
1991-07-25	33.037	77.453	100	0.276
1991-07-25	33.272	77.355	0	0.19
1991-07-25	33.272	77.355	10	0.193
1991-07-25	33.272	77.355	20	0.324
1991-07-25	33.272	77.355	25	0.38
1991-07-25	33.272	77.355	30	0.241
1991-07-25	33.272	77.355	35	0.384
1991-07-25	33.272	77.355	40	1.107
1991-07-25	33.272	77.355	45	1.124
1991-07-25	33.272	77.355	50	1.931
1991-07-25	33.272	77.355	65	0.861
1991-07-25	33.272	77.355	100	0.498
1991-07-26	33.027	76.932	0	0.193
1991-07-26	33.027	76.932	10	0.143
1991-07-26	33.027	76.932	20	0.127
1991-07-26	33.027	76.932	30	0.131
1991-07-26	33.027	76.932	40	0.657
1991-07-26	33.027	76.932	54	0.821
1991-07-26	33.027	76.932	70	0.524
1991-07-26	33.027	76.932	80	0.291
1991-07-26	33.027	76.932	100	0.073
1991-07-26	34.155	76.798	0	0.077
1991-07-26	34.155	76.798	20	0.053
1991-07-26	34.155	76.798	30	0.562
1991-07-26	34.155	76.798	45	0.674
1991-07-26	34.155	76.798	60	0.66
1991-07-26	34.155	76.798	80	0.391
1991-07-26	34.155	76.798	100	0.204
1991-07-26	34.86	76.613	0	0.17
1991-07-26	34.86	76.613	20	0.244
1991-07-26	34.86	76.613	40	0.555
1991-07-26	34.86	76.613	50	0.955
1991-07-26	34.86	76.613	60	1.525
1991-07-26	34.86	76.613	80	0.311
1991-07-26	34.86	76.613	100	0.052
1991-07-27	34.837	76.497	0	0.193
1991-07-27	34.837	76.497	20	0.36
1991-07-27	34.837	76.497	40	1.123
1991-07-27	34.837	76.497	50	1.35
1991-07-27	34.837	76.497	60	0.256
1991-07-27	34.837	76.497	80	0.279
1991-07-27	34.837	76.497	100	0.126
1991-07-27	34.825	76.003	0	0.398
1991-07-27	34.825	76.003	15	0.224
1991-07-27	34.825	76.003	35	1.003
1991-07-27	34.825	76.003	50	0.198
1991-07-27	34.825	76.003	60	0.118
1991-07-27	34.825	76.003	80	0.098
1991-07-27	34.825	76.003	100	0.03
1993-08-10	14.9833	76	5	0.9751
1993-08-10	14.9833	76	15	1.0169
1993-08-10	14.9833	76	30	0.8771
1993-08-10	14.9833	76	50	0.0836
1993-08-10	14.9833	76	70	0.0533
1993-08-10	14.9833	76	100	0.0513
1993-08-12	30.5817	81.2033	2	0.5361
1993-08-12	30.5817	81.2033	10	0.4474
1993-08-12	30.5817	81.2033	25	0.1462
1993-08-12	30.5817	81.2033	50	0.0919
1993-08-12	30.5817	81.2033	70	0.0551
1993-08-12	30.5817	81.2033	100	0.0264
1993-08-13	30.865	81.4517	5	0.2884
1993-08-13	30.865	81.4517	15	0.1982
1993-08-13	30.865	81.4517	25	0.1442
1993-08-13	30.865	81.4517	50	0.0561
1993-08-13	30.865	81.4517	75	0.0521
1993-08-13	30.865	81.4517	100	0.0304
1993-08-13	30.5183	81.5333	10	0.7404
1993-08-13	30.5183	81.5333	15	0.62
1993-08-13	30.5183	81.5333	25	0.3314
1993-08-13	30.5183	81.5333	50	0.2848
1993-08-13	30.5183	81.5333	75	0.1139
1993-08-13	30.2483	81.5683	5	1.6895
1993-08-13	30.2483	81.5683	15	2.9994
1993-08-13	30.2483	81.5683	30	2.2021
1993-08-13	30.2483	81.5683	50	0.4809
1993-08-13	30.2483	81.5683	70	0.2531
1993-08-13	30.2483	81.5683	100	0.1519
1993-08-13	30.2483	81.6533	2	1.3722
1993-08-13	30.2483	81.6533	15	0.5233
1993-08-13	30.2483	81.6533	30	0.4301
1993-08-13	30.2483	81.6533	50	0.4153
1993-08-13	30.2483	81.6533	70	0.1429
1993-08-13	30.2483	81.6533	100	0.2853
1993-08-17	39.32	82.5583	1.6	0.2962
1993-08-17	39.32	82.5583	15	0.2914
1993-08-17	39.32	82.5583	30	0.2656
1993-08-17	39.32	82.5583	50	0.1282
1993-08-17	39.32	82.5583	70	0.0813
1993-08-17	39.32	82.5583	100	0.0359
1993-08-18	40.21	82.7517	2	0.3923
1993-08-18	40.21	82.7517	15	0.3074
1993-08-18	40.21	82.7517	25	0.2848
1993-08-18	40.21	82.7517	50	0.1522
1993-08-18	40.21	82.7517	75	0.0582
1993-08-18	40.21	82.7517	100	0.0176
1993-08-19	40.915	82.3867	2	0.3893
1993-08-19	40.915	82.3867	15	0.273
1993-08-19	40.915	82.3867	30	0.1882
1993-08-19	40.915	82.3867	50	0.1402
1993-08-19	40.915	82.3867	70	0.0788
1993-08-19	40.915	82.3867	100	0.0297
1993-08-20	41.605	82.2667	2	0.7087
1993-08-20	41.605	82.2667	15	0.5189
1993-08-20	41.605	82.2667	30	0.2043
1993-08-20	41.605	82.2667	50	0.1081
1993-08-20	41.605	82.2667	70	0.0696
1993-08-20	41.605	82.2667	100	0.0251
1993-08-20	42.0383	82.16	2	0.5948
1993-08-20	42.0383	82.16	15	0.5569
1993-08-20	42.0383	82.16	30	0.2538
1993-08-20	42.0383	82.16	50	0.0703
1993-08-20	42.0383	82.16	70	0.0441
1993-08-20	42.0383	82.16	100	0.0225
1993-08-21	49.4967	82.1233	2	0.0108
1993-08-21	49.4967	82.1233	10	1.4428
1993-08-21	49.4967	82.1233	15	1.2023
1993-08-21	49.4967	82.1233	30	0.1161
1993-08-21	49.4967	82.1233	50	0.0641
1993-08-21	49.4967	82.1233	70	0.0267
1993-08-21	49.4967	82.1233	100	0.021
1993-08-21	43.5517	82.0217	2	0.5189
1993-08-21	43.5517	82.0217	10	0.3893
1993-08-21	43.5517	82.0217	15	0.38
1993-08-21	43.5517	82.0217	20	0.2578
1993-08-21	43.5517	82.0217	40	0.1282
1993-08-21	43.5517	82.0217	60	0.0771
1993-08-21	43.5517	82.0217	100	0.0573
1993-08-26	102.327	78.0367	2	0.1537
1993-08-26	102.327	78.0367	10	0.2163
1993-08-26	102.327	78.0367	20	0.1602
1993-08-26	102.327	78.0367	40	0.0821
1993-08-26	102.327	78.0367	60	0.1362
1993-08-26	102.327	78.0367	80	0.0316
1993-08-26	102.327	78.0367	100	0.0859
1993-08-27	102.172	77.6933	5	0.1028
1993-08-27	102.172	77.6933	20	0.1882
1993-08-27	102.172	77.6933	30	0.1001
1993-08-27	102.172	77.6933	40	0.0761
1993-08-27	102.172	77.6933	50	0.0444
1993-08-27	102.172	77.6933	70	0.0278
1993-08-27	102.172	77.6933	90	0.0228
1993-08-27	102.172	77.6933	100	0.024
1993-08-27	101.77	77.8817	2	0.2571
1993-08-27	101.77	77.8817	10	0.2844
1993-08-27	101.77	77.8817	20	0.2339
1993-08-27	101.77	77.8817	40	0.0783
1993-08-27	101.77	77.8817	60	0.0961
1993-08-27	101.77	77.8817	80	0.1041
1993-08-27	101.77	77.8817	100	0.0418
1993-09-01	133.318	76.53	5	0.3894
1993-09-01	133.318	76.53	10	0.3888
1993-09-01	133.318	76.53	15	0.4055
1993-09-01	133.318	76.53	20	0.2672
1993-09-01	133.318	76.53	25	0.1383
1993-09-01	133.318	76.53	33	0.1487
1993-09-02	132.367	78.7183	5	0.5569
1993-09-02	132.367	78.7183	10	0.5948
1993-09-02	132.367	78.7183	20	0.5315
1993-09-02	132.367	78.7183	30	0.2163
1993-09-02	132.367	78.7183	40	0.1442
1993-09-02	132.367	78.7183	60	0.0352
1993-09-02	132.367	78.7183	80	0.024
1993-09-02	132.367	78.7183	100	0.0168
1993-09-03	130.55	79.645	2	0.5062
1993-09-03	130.55	79.645	10	0.5315
1993-09-03	130.55	79.645	20	0.3774
1993-09-03	130.55	79.645	30	0.2871
1993-09-03	130.55	79.645	50	0.0809
1993-09-03	130.55	79.645	75	0.0297
1993-09-03	130.55	79.645	100	0.0152
1993-09-04	132.897	78.475	5	0.6961
1993-09-04	132.897	78.475	10	0.6201
1993-09-04	132.897	78.475	20	0.8606
1993-09-04	132.897	78.475	30	0.9872
1993-09-04	132.897	78.475	40	0.4556
1993-09-04	132.897	78.475	50	0.1322
1993-09-04	132.897	78.475	75	0.0329
1993-09-04	132.897	78.475	100	0.0152
1993-09-04	133.058	78.38	5	1.0125
1993-09-04	133.058	78.38	10	1.0631
1993-09-04	133.058	78.38	20	1.1011
1993-09-04	133.058	78.38	30	0.5948
1993-09-04	133.058	78.38	40	0.0897
1993-09-04	133.058	78.38	50	0.0519
1993-09-04	133.058	78.38	75	0.0329
1993-09-04	133.058	78.38	100	0.0329
1993-09-04	133.33	78.24	5	0.7214
1993-09-04	133.33	78.24	10	0.6708
1993-09-04	133.33	78.24	20	0.4809
1993-09-04	133.33	78.24	30	0.7973
1993-09-04	133.33	78.24	40	0.1642
1993-09-04	133.33	78.24	50	0.0729
1993-09-04	133.33	78.24	75	0.0316
1993-09-04	133.33	78.24	100	0.0136
1993-09-05	133.377	78.1633	5	3.0754
1993-09-05	133.377	78.1633	10	5.9229
1993-09-05	133.377	78.1633	20	6.3785
1993-09-05	133.377	78.1633	30	0.4556
1993-09-05	133.377	78.1633	40	0.0758
1993-09-05	133.377	78.1633	50	0.1682
1993-09-05	133.377	78.1633	75	0.0481
1993-09-05	133.377	78.1633	100	0.0354
1993-09-05	133.518	78.1	2	2.2527
1993-09-05	133.518	78.1	10	2.2021
1993-09-05	133.518	78.1	20	2.278
1993-09-05	133.518	78.1	30	1.6706
1993-09-05	133.518	78.1	40	0.0881
1993-09-05	133.518	78.1	50	0.0761
1993-09-05	133.518	78.1	75	0.0443
1993-09-05	133.518	78.1	100	0.0316
1993-09-05	133.557	78.0733	2	2.2021
1993-09-05	133.557	78.0733	10	2.6577
1993-09-05	133.557	78.0733	20	2.5058
1993-09-05	133.557	78.0733	30	0.4556
1993-09-05	133.557	78.0733	40	0.1402
1993-09-05	133.557	78.0733	50	0.0801
1993-09-05	133.557	78.0733	75	0.0537
1993-09-06	133.565	77.9067	2	1.0504
1993-09-06	133.565	77.9067	10	1.4174
1993-09-06	133.565	77.9067	15	1.3415
1993-09-06	133.565	77.9067	20	0.3797
1993-09-06	133.565	77.9067	30	0.0481
1993-09-06	133.565	77.9067	40	0.0458
1993-09-06	133.565	77.9067	50	0.0481
1993-09-06	133.565	77.9067	60	0.0528
1993-09-06	133.565	77.9067	72	0.0492
1993-09-06	133.575	77.6617	2	0.6328
1993-09-06	133.575	77.6617	10	1.1137
1993-09-06	133.575	77.6617	15	1.9237
1993-09-06	133.575	77.6617	20	1.9743
1993-09-06	133.575	77.6617	30	0.443
1993-09-06	133.575	77.6617	40	0.1121
1993-09-06	133.575	77.6617	57	0.1041
1993-09-06	133.57	77.405	2	0.6075
1993-09-06	133.57	77.405	10	0.7087
1993-09-06	133.57	77.405	15	0.6834
1993-09-06	133.57	77.405	20	0.5118
1993-09-06	133.57	77.405	30	0.1922
1993-09-06	133.57	77.405	40	0.1802
1993-09-06	133.57	77.405	48	0.1962
1993-09-07	126.387	77.0333	2	0.3854
1993-09-07	126.387	77.0333	7	0.6834
1993-09-07	126.387	77.0333	17	0.4303
1993-09-07	126.387	77.0333	25	0.2232
1993-09-07	126.387	77.0333	36	0.0582
1993-09-07	126.387	77.0333	45	0.0456
1993-09-07	126.387	77.0333	61	0.038
1993-09-07	126.387	77.0333	70	0.0506
1993-09-07	126.387	77.0333	87	0.0197
1993-09-08	126.085	77.7	7	0.3588
1993-09-08	126.085	77.7	18	0.2909
1993-09-08	126.085	77.7	30	0.0998
1993-09-08	126.085	77.7	40	0.0577
1993-09-08	126.085	77.7	50	0.0291
1993-09-08	126.085	77.7	72	0.0207
1993-09-08	126.085	77.7	100	0.0137
1993-09-08	126.24	77.1817	2	1.0251
1993-09-08	126.24	77.1817	10	1.0125
1993-09-08	126.24	77.1817	20	0.9745
1993-09-08	126.24	77.1817	30	0.8859
1993-09-08	126.24	77.1817	40	0.3923
1993-09-08	126.24	77.1817	50	0.0881
1993-09-08	126.24	77.1817	75	0.0418
1993-09-08	126.24	77.1817	100	0.0405
1993-09-09	126.355	77.1283	2	1.5187
1993-09-09	126.355	77.1283	10	1.544
1993-09-09	126.355	77.1283	20	1.1896
1993-09-09	126.355	77.1283	30	0.1442
1993-09-09	126.355	77.1283	50	0.0467
1993-09-09	126.355	77.1283	75	0.0291
1993-09-09	126.355	77.1283	100	0.0278
1993-09-09	126.313	77.0983	2	0.8606
1993-09-09	126.313	77.0983	10	0.81
1993-09-09	126.313	77.0983	20	0.6834
1993-09-09	126.313	77.0983	30	0.4176
1993-09-09	126.313	77.0983	40	0.1602
1993-09-09	126.313	77.0983	50	0.0619
1993-09-09	126.313	77.0983	75	0.038
1993-09-09	126.313	77.0983	100	0.0228
1993-09-10	125.755	77.7283	2	0.2618
1993-09-10	125.755	77.7283	10	0.2525
1993-09-10	125.755	77.7283	20	0.2283
1993-09-10	125.755	77.7283	30	0.0665
1993-09-10	125.755	77.7283	40	0.0456
1993-09-10	125.755	77.7283	50	0.0367
1993-09-10	125.755	77.7283	75	0.0144
1993-09-10	125.755	77.7283	100	0.0108
1993-09-11	125.043	78.12	2	0.2989
1993-09-11	125.043	78.12	10	0.3029
1993-09-11	125.043	78.12	20	0.3116
1993-09-11	125.043	78.12	30	0.2578
1993-09-11	125.043	78.12	40	0.0924
1993-09-11	125.043	78.12	50	0.0813
1993-09-11	125.043	78.12	75	0.0251
1993-09-11	125.043	78.12	100	0.0188
1993-09-12	122.897	79.2433	2	0.1882
1993-09-12	122.897	79.2433	10	0.2003
1993-09-12	122.897	79.2433	20	0.1882
1993-09-12	122.897	79.2433	30	0.1922
1993-09-12	122.897	79.2433	40	0.1602
1993-09-12	122.897	79.2433	50	0.104
1993-09-12	122.897	79.2433	75	0.0544
1993-09-12	122.897	79.2433	100	0.0292
1993-09-13	119.905	79.1883	2	0.1762
1993-09-13	119.905	79.1883	10	0.1762
1993-09-13	119.905	79.1883	20	0.1682
1993-09-13	119.905	79.1883	30	0.134
1993-09-13	119.905	79.1883	40	0.1464
1993-09-13	119.905	79.1883	50	0.1522
1993-09-13	119.905	79.1883	75	0.0308
1993-09-13	119.905	79.1883	100	0.014
1993-09-14	118.712	78.67	10	0.1562
1993-09-14	118.712	78.67	15	0.1371
1993-09-14	118.712	78.67	20	0.1562
1993-09-14	118.712	78.67	30	0.1329
1993-09-14	118.712	78.67	40	0.1007
1993-09-14	118.712	78.67	50	0.1148
1993-09-14	118.712	78.67	75	0.0376
1993-09-14	118.712	78.67	100	0.0168
1993-09-15	118.553	78.0033	2	0.1158
1993-09-15	118.553	78.0033	10	0.1116
1993-09-15	118.553	78.0033	20	0.1137
1993-09-15	118.553	78.0033	30	0.0998
1993-09-15	118.553	78.0033	40	0.0644
1993-09-15	118.553	78.0033	50	0.0557
1993-09-15	118.553	78.0033	75	0.0196
1993-09-15	118.553	78.0033	100	0.0136
1993-09-16	118.572	77.6883	2	0.1882
1993-09-16	118.572	77.6883	10	0.1522
1993-09-16	118.572	77.6883	20	0.1362
1993-09-16	118.572	77.6883	30	0.1041
1993-09-16	118.572	77.6883	40	0.0613
1993-09-16	118.572	77.6883	50	0.0506
1993-09-16	118.572	77.6883	75	0.022
1993-09-16	118.572	77.6883	100	0.016
1993-09-16	118.425	77.56	2	0.1362
1993-09-16	118.425	77.56	15	0.1001
1993-09-16	118.425	77.56	30	0.0582
1993-09-16	118.425	77.56	50	0.0209
1993-09-16	118.425	77.56	100	0.0092
1993-09-17	118.312	77.4483	2	0.1842
1993-09-17	118.312	77.4483	10	0.1682
1993-09-17	118.312	77.4483	20	0.0921
1993-09-17	118.312	77.4483	30	0.1121
1993-09-17	118.312	77.4483	40	0.0573
1993-09-17	118.312	77.4483	50	0.0342
1993-09-17	118.312	77.4483	75	0.0156
1993-09-17	118.312	77.4483	100	0.0134
1993-09-17	118.175	77.4117	2	0.2139
1993-09-17	118.175	77.4117	10	0.2123
1993-09-17	118.175	77.4117	20	0.1602
1993-09-17	118.175	77.4117	30	0.0838
1993-09-17	118.175	77.4117	40	0.0554
1993-09-17	118.175	77.4117	50	0.043
1993-09-17	118.175	77.4117	75	0.019
1993-09-17	118.175	77.4117	100	0.0154
1993-09-18	118.53	77.265	2	0.1802
1993-09-18	118.53	77.265	10	0.1802
1993-09-18	118.53	77.265	20	0.1562
1993-09-18	118.53	77.265	30	0.1242
1993-09-18	118.53	77.265	40	0.0582
1993-09-18	118.53	77.265	50	0.0329
1993-09-18	118.53	77.265	75	0.0208
1993-09-18	118.53	77.265	100	0.0156
1993-09-18	118.737	77.185	2	0.2325
1993-09-18	118.737	77.185	10	0.2139
1993-09-18	118.737	77.185	20	0.2123
1993-09-18	118.737	77.185	30	0.1402
1993-09-18	118.737	77.185	40	0.0532
1993-09-18	118.737	77.185	50	0.0228
1993-09-18	118.737	77.185	75	0.0206
1993-09-18	118.737	77.185	100	0.0183
1993-09-20	109.233	78.2683	2	0.418
1993-09-20	109.233	78.2683	10	0.2844
1993-09-20	109.233	78.2683	20	0.0884
1993-09-20	109.233	78.2683	30	0.0582
1993-09-20	109.233	78.2683	40	0.0418
1993-09-20	109.233	78.2683	48	0.0381
1993-09-20	110.823	78.4683	2	0.1322
1993-09-20	110.823	78.4683	10	0.1242
1993-09-20	110.823	78.4683	20	0.0722
1993-09-20	110.823	78.4683	30	0.0354
1993-09-20	110.823	78.4683	40	0.019
1993-09-20	110.823	78.4683	50	0.0184
1993-09-20	110.823	78.4683	75	0.0108
1993-09-20	110.823	78.4683	100	0.0096
1993-09-21	112.53	78.6917	2	0.1562
1993-09-21	112.53	78.6917	10	0.1362
1993-09-21	112.53	78.6917	20	0.0733
1993-09-21	112.53	78.6917	30	0.0821
1993-09-21	112.53	78.6917	40	0.0494
1993-09-21	112.53	78.6917	50	0.0367
1993-09-21	112.53	78.6917	75	0.0124
1993-09-21	112.53	78.6917	100	0.0072
1993-09-21	112.7	78.75	2	0.1161
1993-09-21	112.7	78.75	10	0.1051
1993-09-21	112.7	78.75	20	0.0821
1993-09-21	112.7	78.75	30	0.0456
1993-09-21	112.7	78.75	40	0.0456
1993-09-21	112.7	78.75	50	0.0311
1993-09-21	112.7	78.75	75	0.0136
1993-09-21	112.7	78.75	100	0.0076
1993-09-22	111.37	78.58	2	0.1139
1993-09-22	111.37	78.58	10	0.1442
1993-09-22	111.37	78.58	20	0.1242
1993-09-22	111.37	78.58	30	0.0468
1993-09-22	111.37	78.58	40	0.0201
1993-09-22	111.37	78.58	50	0.014
1993-09-22	111.37	78.58	75	0.0144
1993-09-22	111.37	78.58	100	0.0084
1993-09-23	105.113	77.8983	2	0.5315
1993-09-23	105.113	77.8983	10	0.5189
1993-09-23	105.113	77.8983	20	0.2192
1993-09-23	105.113	77.8983	30	0.0506
1993-09-23	105.113	77.8983	40	0.0443
1993-09-23	105.113	77.8983	50	0.0354
1993-09-23	105.113	77.8983	75	0.0354
1993-09-23	105.113	77.8983	100	0.0165
1993-09-23	104.625	77.9917	2	0.5442
1993-09-23	104.625	77.9917	10	0.5315
1993-09-23	104.625	77.9917	20	0.2043
1993-09-23	104.625	77.9917	30	0.1121
1993-09-23	104.625	77.9917	50	0.0342
1993-09-24	105.512	78.2917	2	0.3448
1993-09-24	105.512	78.2917	10	0.3568
1993-09-24	105.512	78.2917	20	0.2405
1993-09-24	105.512	78.2917	30	0.0519
1993-09-24	105.512	78.2917	40	0.0342
1993-09-24	105.512	78.2917	50	0.0202
1994-07-14	-11.1035	74.9403	10	2.5
1994-07-14	-11.1035	74.9403	20	2.32
1994-07-14	-11.1035	74.9403	35	0.56
1994-07-14	-11.1035	74.9403	75	0.11
1994-07-14	-11.1035	74.9403	100	0.05
1994-07-16	-12.3183	74.9583	0	0.89
1994-07-16	-12.3183	74.9583	10	0.89
1994-07-16	-12.3183	74.9583	20	0.45
1994-07-16	-12.3183	74.9583	35	0.22
1994-07-16	-12.3183	74.9583	55	0.12
1994-07-16	-12.3183	74.9583	75	0.08
1994-07-16	-12.3183	74.9583	100	0.06
1994-07-19	-12.9117	74.9967	10	0.3
1994-07-19	-12.9117	74.9967	20	0.51
1994-07-19	-12.9117	74.9967	30	0.3
1994-07-19	-12.9117	74.9967	50	0.18
1994-07-19	-12.9117	74.9967	75	0.07
1994-07-19	-12.9117	74.9967	100	0.04
1994-07-20	-12.6483	74.9932	10	0.95
1994-07-20	-12.6483	74.9932	18	1.37
1994-07-20	-12.6483	74.9932	30	0.74
1994-07-20	-12.6483	74.9932	50	0.15
1994-07-20	-12.6483	74.9932	75	0.05
1994-07-20	-12.6483	74.9932	100	0.05
1994-07-22	-13.7467	75.015	0	0.22
1994-07-22	-13.7467	75.015	10	0.16
1994-07-22	-13.7467	75.015	20	0.08
1994-07-22	-13.7467	75.015	35	0.05
1994-07-22	-13.7467	75.015	40	0.05
1994-07-22	-13.7467	75.015	60	0.03
1994-07-22	-13.7467	75.015	100	0.03
1994-07-23	-12.4617	75.06	0	0.5
1994-07-23	-12.4617	75.06	10	0.62
1994-07-23	-12.4617	75.06	20	0.14
1994-07-23	-12.4617	75.06	40	0.05
1994-07-23	-12.4617	75.06	60	0.05
1994-07-23	-12.4617	75.06	100	0.01
1994-07-26	-11.1033	74.9467	10	1.84
1994-07-26	-11.1033	74.9467	20	0.83
1994-07-26	-11.1033	74.9467	35	0.18
1994-07-26	-11.1033	74.9467	55	0.08
1994-07-26	-11.1033	74.9467	80	0.04
1994-07-26	-11.1033	74.9467	100	0.02
1994-07-28	-12.79	74.9317	10	2.23
1994-07-28	-12.79	74.9317	20	1.26
1994-07-28	-12.79	74.9317	30	0.39
1994-07-28	-12.79	74.9317	40	0.27
1994-07-28	-12.79	74.9317	60	0.27
1994-07-28	-12.79	74.9317	100	0.09
1994-07-29	-13.94	74.98	0	1.52
1994-07-29	-13.94	74.98	5	0.56
1994-07-29	-13.94	74.98	20	0.19
1994-07-29	-13.94	74.98	40	0.1
1994-07-29	-13.94	74.98	60	0.04
1994-07-29	-13.94	74.98	100	0.02
1994-07-29	-12.12	74.9953	0	2.02
1994-07-29	-12.12	74.9953	5	2.44
1994-07-29	-12.12	74.9953	20	1.4
1994-07-29	-12.12	74.9953	40	0.15
1994-07-29	-12.12	74.9953	60	0.09
1994-07-29	-12.12	74.9953	100	0.02
1994-07-29	-11.42	75	0	1.88
1994-07-29	-11.42	75	10	2.47
1994-07-29	-11.42	75	20	1.16
1994-07-29	-11.42	75	40	0.32
1994-07-29	-11.42	75	60	0.1
1994-07-29	-11.42	75	100	0.02
1994-07-29	-9.9262	74.9967	0	2.88
1994-07-29	-9.9262	74.9967	5	2.68
1994-07-29	-9.9262	74.9967	20	1.01
1994-07-29	-9.9262	74.9967	40	0.28
1994-07-29	-9.9262	74.9967	60	0.05
1994-07-29	-9.9262	74.9967	100	0.02
1994-07-30	-8.01	75	0	1.84
1994-07-30	-8.01	75	5	0.64
1994-07-30	-8.01	75	20	0.71
1994-07-30	-8.01	75	40	0.8
1994-07-30	-8.01	75	60	0.15
1994-07-30	-8.01	75	100	0.07
1994-07-30	-6.0667	75	0	1.28
1994-07-30	-6.0667	75	10	2.35
1994-07-30	-6.0667	75	20	1.31
1994-07-30	-6.0667	75	40	0.51
1994-07-30	-6.0667	75	60	0.05
1994-07-30	-6.0667	75	100	0.03
1994-07-30	-4.1367	75.0017	5	0.92
1994-07-30	-4.1367	75.0017	20	0.98
1994-07-30	-4.1367	75.0017	40	0.65
1994-07-30	-4.1367	75.0017	60	0.08
1994-07-30	-4.1367	75.0017	100	0.02
1994-07-31	-2.2017	75	0	0.62
1994-07-31	-2.2017	75	10	0.95
1994-07-31	-2.2017	75	20	0.89
1994-07-31	-2.2017	75	40	0.19
1994-07-31	-2.2017	75	60	0.09
1994-07-31	-2.2017	75	100	0.04
1994-08-01	0.1818	75	0	0.48
1994-08-01	0.1818	75	10	0.77
1994-08-01	0.1818	75	20	0.83
1994-08-01	0.1818	75	40	0.39
1994-08-01	0.1818	75	60	0.24
1994-08-01	0.1818	75	100	0.12
1994-08-01	1.659	75.0017	0	0.59
1994-08-01	1.659	75.0017	8	0.42
1994-08-01	1.659	75.0017	20	0.33
1994-08-01	1.659	75.0017	40	0.29
1994-08-01	1.659	75.0017	60	0.19
1994-08-01	1.659	75.0017	100	0.04
1994-08-02	3.5883	75.0017	0	1.19
1994-08-02	3.5883	75.0017	5	0.83
1994-08-02	3.5883	75.0017	20	0.65
1994-08-02	3.5883	75.0017	40	0.46
1994-08-02	3.5883	75.0017	60	0.27
1994-08-02	3.5883	75.0017	100	0.03
1994-08-02	5.5117	75	0	0.42
1994-08-02	5.5117	75	10	0.43
1994-08-02	5.5117	75	20	0.37
1994-08-02	5.5117	75	40	0.05
1994-08-02	5.5117	75	60	0.03
1994-08-02	5.5117	75	100	0.01
1994-08-03	7.445	74.9983	0	0.68
1994-08-03	7.445	74.9983	10	0.76
1994-08-03	7.445	74.9983	20	0.74
1994-08-03	7.445	74.9983	40	0.48
1994-08-03	7.445	74.9983	60	0.16
1994-08-03	7.445	74.9983	100	0.04
1994-08-03	9.369	75	0	1.29
1994-08-03	9.369	75	5	1.07
1994-08-03	9.369	75	20	0.8
1994-08-03	9.369	75	40	0.8
1994-08-03	9.369	75	60	0.45
1994-08-03	9.369	75	100	0.08
1994-08-03	11.305	75	0	0.14
1994-08-03	11.305	75	10	0.98
1994-08-03	11.305	75	20	0.86
1994-08-03	11.305	75	40	0.8
1994-08-03	11.305	75	60	0.1
1994-08-03	11.305	75	100	0.05
1994-08-03	13.2337	74.999	0	0.59
1994-08-03	13.2337	74.999	10	0
1994-08-03	13.2337	74.999	20	1.1
1994-08-03	13.2337	74.999	40	0.68
1994-08-03	13.2337	74.999	60	0.06
1994-08-03	13.2337	74.999	100	0.13
1994-08-04	15.1633	74.9983	0	1.08
1994-08-04	15.1633	74.9983	10	1.31
1994-08-04	15.1633	74.9983	20	1.28
1994-08-04	15.1633	74.9983	40	0.74
1994-08-04	15.1633	74.9983	60	0.31
1994-08-04	15.1633	74.9983	100	0.05
1994-08-04	16.4577	75.0007	0	1.29
1994-08-04	16.4577	75.0007	10	1.38
1994-08-04	16.4577	75.0007	20	1.34
1994-08-04	16.4577	75.0007	40	0.74
1994-08-04	16.4577	75.0007	60	0.22
1994-08-04	16.4577	75.0007	100	0.15
1994-08-05	-3.2183	78.9983	0	2.04
1994-08-05	-3.2183	78.9983	10	1.37
1994-08-05	-3.2183	78.9983	20	0.26
1994-08-05	-3.2183	78.9983	30	0.12
1994-08-05	-3.2183	78.9983	70	0.05
1994-08-05	-3.2183	78.9983	100	0.03
1994-08-07	-5.665	79.0133	10	2.65
1994-08-07	-5.665	79.0133	20	1.72
1994-08-07	-5.665	79.0133	40	0.13
1994-08-07	-5.665	79.0133	60	0.1
1994-08-07	-5.665	79.0133	80	0.05
1994-08-07	-5.665	79.0133	100	0.05
1994-08-08	-9.9633	79.0017	0	0.11
1994-08-08	-9.9633	79.0017	10	0
1994-08-08	-9.9633	79.0017	20	0.36
1994-08-08	-9.9633	79.0017	40	0
1994-08-08	-9.9633	79.0017	60	0.08
1994-08-08	-9.9633	79.0017	80	0.06
1994-08-08	-9.9633	79.0017	100	0.06
1994-08-08	-7.32	78.9917	0	5.11
1994-08-08	-7.32	78.9917	10	4.43
1994-08-08	-7.32	78.9917	20	3.8
1994-08-08	-7.32	78.9917	40	0.34
1994-08-08	-7.32	78.9917	60	0.43
1994-08-08	-7.32	78.9917	100	0.22
1994-08-09	-6.0017	78.995	0	5.37
1994-08-09	-6.0017	78.995	10	2.14
1994-08-09	-6.0017	78.995	20	0.56
1994-08-09	-6.0017	78.995	30	0.26
1994-08-09	-6.0017	78.995	50	0.42
1994-08-09	-6.0017	78.995	70	0.54
1994-08-09	-6.0017	78.995	100	0.33
1994-08-09	-5.7267	78.995	0	1.31
1994-08-09	-5.7267	78.995	10	0.89
1994-08-09	-5.7267	78.995	20	0.23
1994-08-09	-5.7267	78.995	40	0.19
1994-08-09	-5.7267	78.995	60	0.08
1994-08-09	-5.7267	78.995	100	0.07
1994-08-09	-5.0367	79.0017	0	2.72
1994-08-09	-5.0367	79.0017	10	2.97
1994-08-09	-5.0367	79.0017	20	1.03
1994-08-09	-5.0367	79.0017	40	0.11
1994-08-09	-5.0367	79.0017	60	0.12
1994-08-09	-5.0367	79.0017	100	0.04
1994-08-09	-4.36	79.0033	0	4.26
1994-08-09	-4.36	79.0033	5	2.97
1994-08-09	-4.36	79.0033	10	0.83
1994-08-09	-4.36	79.0033	40	0.11
1994-08-09	-4.36	79.0033	60	0.08
1994-08-09	-4.36	79.0033	100	0.04
1994-08-10	-3.475	79.0017	0	0.72
1994-08-10	-3.475	79.0017	10	0.64
1994-08-10	-3.475	79.0017	20	0.18
1994-08-10	-3.475	79.0017	40	0.17
1994-08-10	-3.475	79.0017	60	0.04
1994-08-10	-3.475	79.0017	100	0.02
1994-08-10	-0.995	79.0017	0	1.22
1994-08-10	-0.995	79.0017	10	1.63
1994-08-10	-0.995	79.0017	20	2.23
1994-08-10	-0.995	79.0017	40	0.74
1994-08-10	-0.995	79.0017	60	0.24
1994-08-10	-0.995	79.0017	100	0.04
1994-08-10	-1.025	79.005	0	1.8
1994-08-10	-1.025	79.005	10	1.37
1994-08-10	-1.025	79.005	20	3.45
1994-08-10	-1.025	79.005	40	0.38
1994-08-10	-1.025	79.005	60	0.14
1994-08-10	-1.025	79.005	100	0.05
1995-07-19	97.065	77.523	10	0.51
1995-07-19	97.065	77.523	20	0.14
1995-07-19	97.065	77.523	30	0.06
1995-07-19	97.065	77.523	50	0.08
1995-07-19	97.065	77.523	75	0.05
1995-07-19	97.065	77.523	100	0.03
1995-07-22	125.91	77.705	10	0.1
1995-07-22	125.91	77.705	20	0.4
1995-07-22	125.91	77.705	30	0.04
1995-07-22	125.91	77.705	50	0.03
1995-07-22	125.91	77.705	75	0.01
1995-07-22	125.91	77.705	100	0.02
1995-07-24	144.89	78.01	5	0.24	96.99
1995-07-24	144.89	78.01	10	0.17
1995-07-24	144.89	78.01	15	0.19
1995-07-24	144.89	78.01	20	0.19	66.99
1995-07-24	144.89	78.01	25	0.14
1995-07-24	144.89	78.01	30	0.16	63.05
1995-07-24	144.89	78.01	41	0.15
1995-07-24	144.89	78.01	46	0.16	55.88
1995-07-25	147.347	78.977	5	0.07
1995-07-25	147.347	78.977	10	0.08
1995-07-25	147.347	78.977	15	0.04
1995-07-25	147.347	78.977	20	0
1995-07-25	147.347	78.977	25	0.03
1995-07-25	147.347	78.977	30	0.05
1995-07-25	147.347	78.977	40	0.03
1995-07-25	147.347	78.977	50	0.03
1995-07-25	147.347	78.977	60	0.02
1995-07-25	147.347	78.977	70	0.02
1995-07-25	147.347	78.977	80	0.01
1995-07-25	147.347	78.977	100	0.01
1995-07-26	148.102	79.452	16	0.2	35.85
1995-07-26	148.102	79.452	20	0.01
1995-07-26	148.102	79.452	30	0.03	26.32
1995-07-26	148.102	79.452	40	0.04
1995-07-26	148.102	79.452	50	0.03	30.6
1995-07-26	148.102	79.452	75	0.01
1995-07-26	148.102	79.452	100	0.01	34.33
1995-07-28	146.345	79.15	5	0.06	133.7
1995-07-28	146.345	79.15	10	0.06	64.21
1995-07-28	146.345	79.15	15	0.05	39.22
1995-07-28	146.345	79.15	20	0.04	35.76
1995-07-28	146.345	79.15	30	0.03	30.98
1995-07-28	146.345	79.15	40	0.02	37.52
1995-07-28	146.345	79.15	50	0.02	35.06
1995-07-28	146.345	79.15	60	0.02	22.3
1995-07-28	146.345	79.15	70	0.01	28.01
1995-07-28	146.345	79.15	80	0.02	31
1995-07-29	144.122	78.655	5	1.14
1995-07-29	144.122	78.655	10	0.96
1995-07-29	144.122	78.655	15	0.18
1995-07-29	144.122	78.655	20	0.13
1995-07-29	144.122	78.655	30	0.09
1995-07-29	144.122	78.655	40	0.08
1995-07-29	144.122	78.655	50	0.07
1995-07-29	144.122	78.655	60	0.07
1995-07-29	144.122	78.655	65	0.07
1995-07-30	140.018	77.998	5	0.66
1995-07-30	140.018	77.998	10	0.52
1995-07-30	140.018	77.998	15	1.71
1995-07-30	140.018	77.998	20	2.1
1995-07-30	140.018	77.998	30	1.9
1995-07-30	140.018	77.998	40	0.91
1995-07-30	140.018	77.998	46	1.36
1995-07-30	140	77.498	5	0.28
1995-07-30	140	77.498	10	0.41
1995-07-30	140	77.498	15	0.53
1995-07-30	140	77.498	20	0.51
1995-07-30	140	77.498	25	0.58
1995-07-30	140	77.498	33	0.55
1995-07-31	135.003	77.248	5	0.18
1995-07-31	135.003	77.248	10	0.13
1995-07-31	135.003	77.248	15	0.54
1995-07-31	135.003	77.248	21	1.72
1995-07-31	135.003	77.248	31	1.94
1995-07-31	135.003	77.248	38	1.61
1995-07-31	131.038	76.9	5	0.25
1995-07-31	131.038	76.9	15	0.88
1995-07-31	131.038	76.9	30	0.9
1995-07-31	131.038	76.9	38	0.82
1995-07-31	131.038	76.9	55	0.4
1995-07-31	129.987	75.998	5	0.07
1995-07-31	129.987	75.998	10	0.1
1995-07-31	129.987	75.998	15	0.2
1995-07-31	129.987	75.998	20	0.13
1995-07-31	129.987	75.998	25	0.47
1995-07-31	129.987	75.998	30	0.66
1995-07-31	129.987	75.998	40	0.61
1995-08-01	129.987	76.887	5	0.05
1995-08-01	129.987	76.887	10	0.08	169.56
1995-08-01	129.987	76.887	15	0.1
1995-08-01	129.987	76.887	20	1.12	214.67
1995-08-01	129.987	76.887	30	0.49	166.87
1995-08-01	129.987	76.887	39	0.32
1995-08-01	129.987	76.887	47	0.09	135.25
1995-08-01	129.987	76.887	58	0.07
1995-08-01	130.008	77.597	5	0.23
1995-08-01	130.008	77.597	10	0.56
1995-08-01	130.008	77.597	15	1.03
1995-08-01	130.008	77.597	20	0.7
1995-08-01	130.008	77.597	30	0.78
1995-08-01	130.008	77.597	40	0.16
1995-08-01	130.008	77.597	50	0.05
1995-08-01	130.008	77.597	60	0.03
1995-08-01	130.008	77.597	75	0.05
1995-08-01	130.008	77.597	100	0.05
1995-08-01	130.045	77.62	5	0.21	97.36
1995-08-01	130.045	77.62	10	0.48	123.73
1995-08-01	130.045	77.62	20	0.91	74.44
1995-08-01	130.045	77.62	30	0.5	69.07
1995-08-01	130.045	77.62	40	0.07
1995-08-01	130.045	77.62	50	0.04	51.54
1995-08-01	130.045	77.62	80	0.02
1995-08-01	130.045	77.62	100	0.02	45.48
1995-08-02	130.047	77.703	5	0.25
1995-08-02	130.047	77.703	10	0.27
1995-08-02	130.047	77.703	20	0.47
1995-08-02	130.047	77.703	30	0.32
1995-08-02	130.047	77.703	50	0.09
1995-08-02	130.047	77.703	75	0.05
1995-08-02	130.047	77.703	100	0.02
1995-08-02	130.042	77.85	10	0.24	142.42
1995-08-02	130.042	77.85	20	0.12	94.08
1995-08-02	130.042	77.85	30	0.09	76.16
1995-08-02	130.042	77.85	50	0.02	21.51
1995-08-02	130.042	77.85	75	0.02
1995-08-02	130.042	77.85	100	0.01	22.26
1995-08-02	130.04	77.932	10	0.24
1995-08-02	130.04	77.932	20	0.01
1995-08-02	130.04	77.932	30	0.11
1995-08-02	130.04	77.932	50	0.11
1995-08-02	130.04	77.932	75	0.01
1995-08-02	130.04	77.932	100	0.01
1995-08-03	129.983	78.16	10	0.3
1995-08-03	129.983	78.16	20	0.14
1995-08-03	129.983	78.16	30	0.05
1995-08-03	129.983	78.16	60	0.01
1995-08-03	129.983	78.16	75	0.01
1995-08-03	129.983	78.16	100	0.01
1995-08-04	131.413	79.043	10	0.25	85.18
1995-08-04	131.413	79.043	30	0.01	44.78
1995-08-04	131.413	79.043	50	0.01	51.08
1995-08-04	131.413	79.043	75	0	35.54
1995-08-04	131.413	79.043	100	0	36.48
1995-08-07	105.362	81.098	10	0.75	92.96
1995-08-07	105.362	81.098	30	0.32	63.27
1995-08-07	105.362	81.098	50	0.16	59.46
1995-08-07	105.362	81.098	75	0.04	38.6
1995-08-07	105.362	81.098	100	0.01	39.56
1995-08-08	106.172	81.16	10	0.33
1995-08-08	106.172	81.16	20	0.23
1995-08-08	106.172	81.16	30	0.18
1995-08-08	106.172	81.16	50	0.02
1995-08-08	106.172	81.16	75	0.01
1995-08-08	106.172	81.16	100	0.01
1995-08-08	106.577	81.222	10	0.42	125.26
1995-08-08	106.577	81.222	30	0.26	50.76
1995-08-08	106.577	81.222	50	0.11	72.71
1995-08-08	106.577	81.222	75	0.06	42.56
1995-08-08	106.577	81.222	100	0.02	35.66
1995-08-10	104.168	80.835	10	0.36
1995-08-10	104.168	80.835	20	0.25
1995-08-10	104.168	80.835	30	0.13
1995-08-10	104.168	80.835	50	0.03
1995-08-10	104.168	80.835	75	0.02
1995-08-10	104.168	80.835	100	0.01
1995-08-10	103.808	80.788	10	0.44
1995-08-10	103.808	80.788	20	0.64
1995-08-10	103.808	80.788	30	0.12
1995-08-10	103.808	80.788	50	0.04
1995-08-10	103.808	80.788	75	0.01
1995-08-10	103.808	80.788	100	0.03
1995-08-11	103.302	80.727	10	0.15	109.06
1995-08-11	103.302	80.727	20	0.14	0
1995-08-11	103.302	80.727	30	0.05	75.13
1995-08-11	103.302	80.727	50	0.03	73
1995-08-11	103.302	80.727	75	0.14	0
1995-08-11	103.302	80.727	100	0.24	45.09
1995-08-11	103.055	80.657	10	0.86
1995-08-11	103.055	80.657	20	1.08
1995-08-11	103.055	80.657	30	0.66
1995-08-11	103.055	80.657	50	0.13
1995-08-11	103.055	80.657	75	0.07
1995-08-11	103.055	80.657	100	0.03
1995-08-12	101.99	80.43	10	2.02	217.03
1995-08-12	101.99	80.43	20	2.33	212.79
1995-08-12	101.99	80.43	30	1.22	154.08
1995-08-12	101.99	80.43	50	0.09	90
1995-08-12	101.99	80.43	75	0.02
1995-08-12	101.99	80.43	100	0.02	83.56
1995-08-13	104.472	79.488	0	0.67	132.27
1995-08-13	104.472	79.488	10	0.47	111.9
1995-08-13	104.472	79.488	20	0.29	87.04
1995-08-13	104.472	79.488	30	0.14	46.86
1995-08-13	104.472	79.488	40	0.13
1995-08-13	104.472	79.488	60	0.07	74.68
1995-08-13	104.472	79.488	100	0.06	52.54
1995-08-15	133.957	78.535	0	0.68
1995-08-15	133.957	78.535	10	0.44	85.01
1995-08-15	133.957	78.535	20	0.06
1995-08-15	133.957	78.535	30	0.01	48.02
1995-08-15	133.957	78.535	50	0	22.04
1995-08-15	133.957	78.535	75	0
1995-08-15	133.957	78.535	100	0.01	14.59
1995-08-16	134.738	78.718	10	0.35	82.67
1995-08-16	134.738	78.718	30	0.04	42.08
1995-08-16	134.738	78.718	50	0.01	38.56
1995-08-16	134.738	78.718	75	0.01	34.35
1995-08-16	134.738	78.718	100	0.01	28.89
1995-08-17	135	78.81	10	0.29
1995-08-17	135	78.81	20	0.19
1995-08-17	135	78.81	30	0.09
1995-08-17	135	78.81	50	0
1995-08-17	135	78.81	75	0
1995-08-17	135.051	79.177	10	0.36	72.05
1995-08-17	135.051	79.177	30	0.06	43.98
1995-08-17	135.051	79.177	50	0.01	25.06
1995-08-17	135.051	79.177	75	0	30.72
1995-08-17	135.051	79.177	100	0	23.49
1995-08-18	134.913	79.988	10	0.21	52.42
1995-08-18	134.913	79.988	30	0.04	29.16
1995-08-18	134.913	79.988	50	0.01	28.48
1995-08-18	134.913	79.988	75	0.01	29.86
1995-08-18	134.913	79.988	100	0.01	35.61
1995-08-19	133.767	80.243	10	0.43
1995-08-19	133.767	80.243	20	0.09
1995-08-19	133.767	80.243	30	0.01
1995-08-19	133.767	80.243	50	0.01
1995-08-19	133.767	80.243	75	0
1995-08-19	133.767	80.243	100	0
1995-08-20	131.057	80.883	10	0.41	26.08
1995-08-20	131.057	80.883	30	0.12	33.35
1995-08-20	131.057	80.883	50	0.02	46.95
1995-08-20	131.057	80.883	75	0.01	40.45
1995-08-20	131.057	80.883	100	0.01	28.14
1995-08-21	135.948	80.978	10	0.26
1995-08-21	135.948	80.978	20	0.14
1995-08-21	135.948	80.978	30	0.03
1995-08-21	135.948	80.978	50	0.01
1995-08-21	135.948	80.978	75	0.01
1995-08-21	135.948	80.978	100	0.01
1995-08-21	136.918	81.028	10	0.23	49.25
1995-08-21	136.918	81.028	30	0.05	30.24
1995-08-21	136.918	81.028	50	0.03	63.12
1995-08-21	136.918	81.028	75	0.01	40.11
1995-08-21	136.918	81.028	100	0.01	31.89
1995-08-23	138.41	81.037	10	0.35
1995-08-23	138.41	81.037	20	0.07
1995-08-23	138.41	81.037	30	0.04
1995-08-23	138.41	81.037	50	0.01
1995-08-23	138.41	81.037	75	0.01
1995-08-23	138.41	81.037	100	0
1995-08-23	138.935	81.068	10	0.22
1995-08-23	138.935	81.068	30	0.04
1995-08-23	138.935	81.068	50	0.01
1995-08-23	138.935	81.068	75	0.01
1995-08-23	138.935	81.068	100	0
1995-08-24	140.155	81.16	10	0.18
1995-08-24	140.155	81.16	20	0.1
1995-08-24	140.155	81.16	30	0.04
1995-08-24	140.155	81.16	50	0.01
1995-08-24	140.155	81.16	75	0.01
1995-08-24	140.155	81.16	100	0.01
1995-08-25	141.868	81.158	10	0.31
1995-08-25	141.868	81.158	20	0.23
1995-08-25	141.868	81.158	30	0.03
1995-08-25	141.868	81.158	50	0.01
1995-08-25	141.868	81.158	75	0.01
1995-08-25	141.868	81.158	100	0.01
1995-08-25	143.425	81.152	10	0.29
1995-08-25	143.425	81.152	20	0.15
1995-08-25	143.425	81.152	30	0.06
1995-08-25	143.425	81.152	50	0.02
1995-08-25	143.425	81.152	75	0.01
1995-08-25	143.425	81.152	100	0.01
1995-08-26	144.727	81.202	10	0.16
1995-08-26	144.727	81.202	20	0.11
1995-08-26	144.727	81.202	30	0.06
1995-08-26	144.727	81.202	50	0.02
1995-08-26	144.727	81.202	75	0.01
1995-08-26	144.727	81.202	100	0.01
1995-08-26	150.092	81.202	10	0.37	60.61
1995-08-26	150.092	81.202	30	0.24	53.67
1995-08-26	150.092	81.202	50	0.01	36.38
1995-08-26	150.092	81.202	75	0.01	23.31
1995-08-26	150.092	81.202	100	0.01	21.47
1995-08-28	150.137	80.508	10	0.16
1995-08-28	150.137	80.508	20	0.11
1995-08-28	150.137	80.508	30	0.09
1995-08-28	150.137	80.508	50	0.02
1995-08-28	150.137	80.508	75	0.01
1995-08-28	150.137	80.508	100	0.01
1995-08-28	149.973	80.34	10	0.3	74.25
1995-08-28	149.973	80.34	30	0.07	49.81
1995-08-28	149.973	80.34	50	0.02	30.29
1995-08-28	149.973	80.34	75	0.01	34.65
1995-08-28	149.973	80.34	100	0.01	40.25
1995-08-29	149.773	80.083	10	0.31	87.87
1995-08-29	149.773	80.083	30	0.1	32.63
1995-08-29	149.773	80.083	50	0.01	37.49
1995-08-29	149.773	80.083	75	0.02	45.66
1995-08-29	149.773	80.083	100	0.01	19.68
1995-08-30	149.808	79.883	10	0.48
1995-08-30	149.808	79.883	20	0.22
1995-08-30	149.808	79.883	30	0.17
1995-08-30	149.808	79.883	50	0.03
1995-08-30	149.808	79.883	75	0.01
1995-08-30	149.808	79.883	100	0
1995-08-30	149.24	79.505	10	0.25
1995-08-30	149.24	79.505	30	0.1
1995-08-30	149.24	79.505	50	0.01
1995-08-30	149.24	79.505	75	0.01
1995-08-30	149.24	79.505	100	0
1995-08-31	144.042	79.748	10	0.24
1995-08-31	144.042	79.748	20	0.12
1995-08-31	144.042	79.748	30	0.09
1995-08-31	144.042	79.748	50	0.02
1995-08-31	144.042	79.748	75	0.01
1995-08-31	144.042	79.748	100	0
1995-08-31	143.087	79.817	10	0.19
1995-08-31	143.087	79.817	20	0.13
1995-08-31	143.087	79.817	30	0.06
1995-08-31	143.087	79.817	50	0.02
1995-08-31	143.087	79.817	75	0.01
1995-08-31	143.087	79.817	100	0.01
1995-09-01	134.82	78.38	10	0.72	92.88
1995-09-01	134.82	78.38	20	0.09
1995-09-01	134.82	78.38	30	0.04	58.19
1995-09-01	134.82	78.38	50	0.01	29.01
1995-09-01	134.82	78.38	75	0.01
1995-09-01	134.82	78.38	100	0	25.8
1995-09-01	135.073	78.338	10	0.72
1995-09-01	135.073	78.338	20	0.26
1995-09-01	135.073	78.338	30	0.12
1995-09-01	135.073	78.338	50	0.03
1995-09-01	135.073	78.338	75	0.01
1995-09-01	135.073	78.338	100	0.01
1995-09-02	135.348	78.325	10	0.44	85.48
1995-09-02	135.348	78.325	20	0.6	72.47
1995-09-02	135.348	78.325	30	0.02	47.71
1995-09-02	135.348	78.325	50	0.03	37.09
1995-09-02	135.348	78.325	75	0.01
1995-09-02	135.348	78.325	100	0.01	44.83
1995-09-02	135.392	78.248	10	0.58
1995-09-02	135.392	78.248	20	1.14
1995-09-02	135.392	78.248	30	0.06
1995-09-02	135.392	78.248	50	0.03
1995-09-02	135.392	78.248	75	0.02
1995-09-02	135.392	78.248	100	0.01
1995-09-04	122.76	80.932	10	0.33	75.15
1995-09-04	122.76	80.932	30	0.06	71.37
1995-09-04	122.76	80.932	50	0.04	34.32
1995-09-04	122.76	80.932	75	0.01	37.73
1995-09-04	122.76	80.932	100	0.01	28.78
1995-09-06	112.932	78.815	10	0.17
1995-09-06	112.932	78.815	20	2.19
1995-09-06	112.932	78.815	30	1.02
1995-09-06	112.932	78.815	50	0.12
1995-09-06	112.932	78.815	75	0.08
1995-09-06	112.932	78.815	100	0.05
1995-09-26	-4	78.9833	11.52	0.33
1995-09-26	-4	78.9833	21.89	0.13
1995-09-26	-4	78.9833	30.82	0.05
1995-09-26	-4	78.9833	51.76	0.03
1995-09-26	-4	78.9833	72.03	0.02
1995-09-26	-4	78.9833	100	0.02
1995-09-26	-5.15	78.9833	10.05	0.19
1995-09-26	-5.15	78.9833	19.85	0.2
1995-09-26	-5.15	78.9833	30.33	0.07
1995-09-26	-5.15	78.9833	40.17	0.04
1995-09-26	-5.15	78.9833	50.33	0.03
1995-09-26	-5.15	78.9833	69.97	0.03
1995-09-26	-5.15	78.9833	100	0.02
1995-09-28	-5.6833	78.9833	9.94	0.09
1995-09-28	-5.6833	78.9833	19.97	0.09
1995-09-28	-5.6833	78.9833	30.32	0.05
1995-09-28	-5.6833	78.9833	41.87	0.04
1995-09-28	-5.6833	78.9833	49.91	0.01
1995-09-28	-5.6833	78.9833	59.62	0.02
1995-09-28	-5.6833	78.9833	69.25	0.02
1995-09-28	-5.6833	78.9833	100	0.01
1995-09-30	-7.55	78.9833	9.49	0.09
1995-09-30	-7.55	78.9833	21.59	0.1
1995-09-30	-7.55	78.9833	30.5	0.07
1995-09-30	-7.55	78.9833	39.16	0.03
1995-09-30	-7.55	78.9833	49.89	0.03
1995-09-30	-7.55	78.9833	59.48	0.03
1995-09-30	-7.55	78.9833	69.48	0.03
1995-09-30	-7.55	78.9833	80.08	0.02
1995-09-30	-7.55	78.9833	89.84	0.02
1995-09-30	-7.55	78.9833	100	0.02
1995-10-02	-5.1167	80.5	10.47	0.03
1995-10-02	-5.1167	80.5	19.39	0.06
1995-10-02	-5.1167	80.5	30.36	0.02
1995-10-02	-5.1167	80.5	50.51	0.01
1995-10-02	-5.1167	80.5	69.67	0.01
1995-10-02	-5.1167	80.5	100	0.1
1995-10-04	-4.2	80.05	9.69	0.03
1995-10-04	-4.2	80.05	19.54	0.04
1995-10-04	-4.2	80.05	29.38	0.02
1995-10-04	-4.2	80.05	49.24	0.01
1995-10-04	-4.2	80.05	69.29	0.01
1995-10-04	-4.2	80.05	100	0.01
1995-10-05	-3.8	79.6167	10.18	0.06
1995-10-05	-3.8	79.6167	20.45	0.05
1995-10-05	-3.8	79.6167	30.14	0.04
1995-10-05	-3.8	79.6167	50.36	0.02
1995-10-05	-3.8	79.6167	70.33	0.02
1995-10-05	-3.8	79.6167	100	0.01
1995-10-10	-10.7333	74.95	9.25	1.03
1995-10-10	-10.7333	74.95	21.4	0.43
1995-10-10	-10.7333	74.95	30	0.28
1995-10-10	-10.7333	74.95	50.96	0.01
1995-10-11	-13.1167	74.9333	9.21	0.93
1995-10-11	-13.1167	74.9333	18.78	0.41
1995-10-11	-13.1167	74.9333	29.68	0.05
1995-10-11	-13.1167	74.9333	39.48	0.02
1995-10-11	-13.1167	74.9333	49.45	0.02
1995-10-11	-13.1167	74.9333	60.93	0.01
1995-10-11	-13.1167	74.9333	71.28	0.01
1995-10-11	-13.1167	74.9333	79.69	0.01
1995-10-11	-13.1167	74.9333	100	0.01
1995-10-12	-13.6333	75.0167	10	0.19
1995-10-12	-13.6333	75.0167	20	0.19
1995-10-12	-13.6333	75.0167	40	0.05
1995-10-12	-13.6333	75.0167	60	0.01
1995-10-12	-13.6333	75.0167	100	0.02
1995-10-14	-12.3167	75	10	0.03
1995-10-14	-12.3167	75	20	0.11
1995-10-14	-12.3167	75	40	0.04
1995-10-14	-12.3167	75	60	0.01
1995-10-14	-12.3167	75	100	0.01
1995-10-15	-11.3333	75	10	0.1
1995-10-15	-11.3333	75	20	0.03
1995-10-15	-11.3333	75	40	0.06
1995-10-15	-11.3333	75	60	0.01
1995-10-15	-11.3333	75	100	0.01
1995-10-15	-9.95	75	10	0.63
1995-10-15	-9.95	75	20	0.61
1995-10-15	-9.95	75	40	0.4
1995-10-15	-9.95	75	60	0.21
1995-10-15	-9.95	75	100	0.02
1995-10-15	-7.3833	75	10	0.51
1995-10-15	-7.3833	75	20	0.62
1995-10-15	-7.3833	75	40	0.76
1995-10-15	-7.3833	75	60	0.42
1995-10-15	-7.3833	75	100	0.05
1995-10-16	-5.4167	75	10	0.52
1995-10-16	-5.4167	75	20	0.49
1995-10-16	-5.4167	75	40	0.19
1995-10-16	-5.4167	75	60	0.04
1995-10-16	-5.4167	75	100	0.01
1995-10-16	-4.7667	75	10.94	0.73
1995-10-16	-4.7667	75	18.71	0.46
1995-10-16	-4.7667	75	30.18	0.49
1995-10-16	-4.7667	75	50.09	0.2
1995-10-16	-4.7667	75	70.52	0.05
1995-10-16	-4.7667	75	100	0.04
1995-10-18	-2.2	75	10	0.41
1995-10-18	-2.2	75	20	0.45
1995-10-18	-2.2	75	40	0.25
1995-10-18	-2.2	75	60	0.03
1995-10-18	-2.2	75	100	0.02
1995-10-18	-0.2667	75	9.14	0.47
1995-10-18	-0.2667	75	17.55	0.47
1995-10-18	-0.2667	75	23.69	0.46
1995-10-18	-0.2667	75	51.55	0.42
1995-10-18	-0.2667	75	71.6	0.06
1995-10-18	-0.2667	75	100	0.03
1995-10-19	2.3	75	10	0.44
1995-10-19	2.3	75	20	0.4
1995-10-19	2.3	75	40	0.32
1995-10-19	2.3	75	60	0.11
1995-10-19	2.3	75	100	0.03
1995-10-20	4.2333	75	10	0.44
1995-10-20	4.2333	75	20	0.46
1995-10-20	4.2333	75	40	0.26
1995-10-20	4.2333	75	60	0.13
1995-10-20	4.2333	75	100	0.02
1995-10-20	5.5	75	10	0.34
1995-10-20	5.5	75	20	0.66
1995-10-20	5.5	75	40	0.34
1995-10-20	5.5	75	60	0.03
1995-10-20	5.5	75	100	0.01
1995-10-20	6.4833	75	10	0.27
1995-10-20	6.4833	75	20	0.21
1995-10-20	6.4833	75	40	0.27
1995-10-20	6.4833	75	60	0.28
1995-10-20	6.4833	75	100	0.27
1995-10-20	7.45	75	10	0.27
1995-10-20	7.45	75	20	0.27
1995-10-20	7.45	75	40	0.27
1995-10-20	7.45	75	60	0.25
1995-10-20	7.45	75	100	0.26
1995-10-21	9.3667	75	10	0.2
1995-10-21	9.3667	75	20	0.19
1995-10-21	9.3667	75	40	0.23
1995-10-21	9.3667	75	60	0.18
1995-10-21	9.3667	75	100	0.18
1995-10-21	11.3	75	20	0.1
1995-10-21	11.3	75	40	0.1
1995-10-21	11.3	75	60	0.1
1995-10-21	11.3	75	100	0.07
1995-10-22	13.25	75	20	0.12
1995-10-22	13.25	75	40	0.1
1995-10-22	13.25	75	60	0.11
1995-10-22	13.25	75	100	0.12
1995-10-22	15.1667	75	10	0.21
1995-10-22	15.1667	75	20	0.22
1995-10-22	15.1667	75	40	0.22
1995-10-22	15.1667	75	60	0.22
1995-10-22	15.1667	75	100	0.21
1995-10-22	17.0667	75	10	0.29
1995-10-22	17.0667	75	20	0.25
1995-10-22	17.0667	75	40	0.06
1995-10-22	17.0667	75	60	0.04
1995-10-22	17.0667	75	100	0.02
1996-07-25	64.865	81.38	20	3.481
1996-07-25	64.865	81.38	30	3.028
1996-07-25	64.865	81.38	40	0.877
1996-07-25	64.865	81.38	50	0.447
1996-07-25	64.865	81.38	60	0.296
1996-07-25	64.865	81.38	80	0.08
1996-07-25	64.865	81.38	100	0.03
1996-07-25	66.862	81.463	2	0.324
1996-07-25	66.862	81.463	10	0.351
1996-07-25	66.862	81.463	20	0.338
1996-07-25	66.862	81.463	30	0.204
1996-07-25	66.862	81.463	40	0.117
1996-07-25	66.862	81.463	50	0.056
1996-07-25	66.862	81.463	75	0.013
1996-07-25	66.862	81.463	100	0.005
1996-07-27	72.02	81.29	2	0.4
1996-07-27	72.02	81.29	10	0.407
1996-07-27	72.02	81.29	20	0.238
1996-07-27	72.02	81.29	30	0.14
1996-07-27	72.02	81.29	40	0.081
1996-07-27	72.02	81.29	50	0.036
1996-07-27	72.02	81.29	75	0.01
1996-07-27	72.02	81.29	100	0.007
1996-07-28	73.79	81.433	10	0.634
1996-07-28	73.79	81.433	20	0.412
1996-07-28	73.79	81.433	30	0.315
1996-07-28	73.79	81.433	40	0.302
1996-07-28	73.79	81.433	60	0.049
1996-07-28	73.79	81.433	80	0.022
1996-07-28	73.79	81.433	100	0.012
1996-07-28	74.557	81.418	10	0.482
1996-07-28	74.557	81.418	20	0.371
1996-07-28	74.557	81.418	30	0.151
1996-07-28	74.557	81.418	40	0.047
1996-07-28	74.557	81.418	50	0.019
1996-07-28	74.557	81.418	75	0.015
1996-07-28	74.557	81.418	100	0.146
1996-07-29	77.457	81.458	10	0.816
1996-07-29	77.457	81.458	20	0.284
1996-07-29	77.457	81.458	30	0.216
1996-07-29	77.457	81.458	40	0.162
1996-07-29	77.457	81.458	50	0.059
1996-07-29	77.457	81.458	60	0.034
1996-07-29	77.457	81.458	80	0.012
1996-07-29	77.457	81.458	100	0.008
1996-07-30	78.955	81.455	2	0.479
1996-07-30	78.955	81.455	10	0.452
1996-07-30	78.955	81.455	20	0.309
1996-07-30	78.955	81.455	30	0.18
1996-07-30	78.955	81.455	40	0.111
1996-07-30	78.955	81.455	50	0.121
1996-07-30	78.955	81.455	60	0.052
1996-07-30	78.955	81.455	80	0.019
1996-07-30	78.955	81.455	89	0.015
1996-07-30	78.955	81.455	100	0.015
1996-07-30	80.852	81.468	2	0.961	14.21
1996-07-30	80.852	81.468	10	0.738
1996-07-30	80.852	81.468	20	0.188
1996-07-30	80.852	81.468	30	0.093
1996-07-30	80.852	81.468	40	0.021
1996-07-30	80.852	81.468	50	0.014	1.94589
1996-07-30	80.852	81.468	75	0.009	2.95338
1996-07-30	80.852	81.468	100	0.005
1996-07-31	82.708	81.543	2	0.879
1996-07-31	82.708	81.543	10	0.861
1996-07-31	82.708	81.543	20	0.383
1996-07-31	82.708	81.543	30	0.222
1996-07-31	82.708	81.543	40	0.034
1996-07-31	82.708	81.543	50	0.024
1996-07-31	82.708	81.543	60	0.017
1996-07-31	82.708	81.543	80	0.006
1996-07-31	82.708	81.543	100	0.005
1996-07-31	82.148	81.7	2	0.825	16.7847
1996-07-31	82.148	81.7	10	0.87
1996-07-31	82.148	81.7	20	0.379
1996-07-31	82.148	81.7	30	0.254
1996-07-31	82.148	81.7	40	0.256
1996-07-31	82.148	81.7	50	0.2	5.37607
1996-07-31	82.148	81.7	80	0.024
1996-07-31	82.148	81.7	100	0.012	3.57529
1996-08-01	85.993	81.833	2	0.587
1996-08-01	85.993	81.833	10	0.518
1996-08-01	85.993	81.833	20	0.306
1996-08-01	85.993	81.833	30	0.192
1996-08-01	85.993	81.833	40	0.062
1996-08-01	85.993	81.833	50	0.039
1996-08-01	85.993	81.833	80	0.016
1996-08-01	85.993	81.833	100	0.011
1996-08-02	88.535	81.837	2	1.695
1996-08-02	88.535	81.837	10	1.042
1996-08-02	88.535	81.837	20	0.482
1996-08-02	88.535	81.837	30	0.19
1996-08-02	88.535	81.837	40	0.123
1996-08-02	88.535	81.837	60	0.033
1996-08-02	88.535	81.837	100	0.006
1996-08-02	90.253	81.747	2	1.432	19.0739
1996-08-02	90.253	81.747	10	1.015
1996-08-02	90.253	81.747	20	0.65
1996-08-02	90.253	81.747	30	0.093
1996-08-02	90.253	81.747	40	0.018
1996-08-02	90.253	81.747	50	0.015	3.13996
1996-08-02	90.253	81.747	80	0.008
1996-08-02	90.253	81.747	100	0.008	2.82347
1996-08-02	91.833	82.04	10	0.189
1996-08-02	91.833	82.04	20	0.329
1996-08-02	91.833	82.04	30	0.15
1996-08-02	91.833	82.04	40	0.131
1996-08-02	91.833	82.04	50	0.124
1996-08-02	91.833	82.04	80	0.035
1996-08-02	91.833	82.04	100	0.014
1996-08-03	91.907	82.192	10	0.287
1996-08-03	91.907	82.192	20	0.301
1996-08-03	91.907	82.192	30	0.245
1996-08-03	91.907	82.192	40	0.235
1996-08-03	91.907	82.192	50	0.123
1996-08-03	91.907	82.192	80	0.048
1996-08-03	91.907	82.192	100	0.005
1996-08-03	91.997	82.333	2	0.307	7.20587
1996-08-03	91.997	82.333	10	0.286
1996-08-03	91.997	82.333	20	0.247
1996-08-03	91.997	82.333	30	0.25
1996-08-03	91.997	82.333	40	0.25
1996-08-03	91.997	82.333	50	0.244	4.30362
1996-08-03	91.997	82.333	60	0.17
1996-08-03	91.997	82.333	80	0.061
1996-08-03	91.997	82.333	100	0.045	7.73104
1996-08-04	92.522	82.673	2	0.084
1996-08-04	92.522	82.673	10	0.07
1996-08-04	92.522	82.673	20	0.057
1996-08-04	92.522	82.673	30	0.055
1996-08-04	92.522	82.673	40	0.046
1996-08-04	92.522	82.673	50	0.045
1996-08-04	92.522	82.673	80	0.035
1996-08-04	92.522	82.673	100	0.01
1996-08-05	94.035	83.198	10	0.148	4.34
1996-08-05	94.035	83.198	20	0.141
1996-08-05	94.035	83.198	30	0.125
1996-08-05	94.035	83.198	40	0.052
1996-08-05	94.035	83.198	60	0.064	5.79
1996-08-05	94.035	83.198	80	0.056
1996-08-05	94.035	83.198	100	0.05	0.48
1996-08-05	96.58	83.5	2	0.193	4.82011
1996-08-05	96.58	83.5	10	0.201
1996-08-05	96.58	83.5	20	0.187
1996-08-05	96.58	83.5	30	0.189
1996-08-05	96.58	83.5	40	0.189
1996-08-05	96.58	83.5	50	0.15	2.64579
1996-08-05	96.58	83.5	80	0.072
1996-08-05	96.58	83.5	100	0.018	2.35376
1996-08-05	98.395	83.83	2	0.16
1996-08-05	98.395	83.83	10	0.158
1996-08-05	98.395	83.83	20	0.128
1996-08-05	98.395	83.83	30	0.126
1996-08-05	98.395	83.83	40	0.146
1996-08-05	98.395	83.83	60	0.108
1996-08-05	98.395	83.83	80	0.026
1996-08-05	98.395	83.83	100	0.01
1996-08-06	101.955	84.36	2	0.424
1996-08-06	101.955	84.36	10	0.434
1996-08-06	101.955	84.36	20	0.413
1996-08-06	101.955	84.36	30	0.384
1996-08-06	101.955	84.36	40	0.326
1996-08-06	101.955	84.36	80	0.031
1996-08-06	101.955	84.36	100	0.016
1996-08-07	103.553	85.555	2	0.361	5.58905
1996-08-07	103.553	85.555	10	0.372
1996-08-07	103.553	85.555	20	0.38
1996-08-07	103.553	85.555	30	0.385
1996-08-07	103.553	85.555	40	0.302
1996-08-07	103.553	85.555	50	0.223	3.05645
1996-08-07	103.553	85.555	80	0.025
1996-08-07	103.553	85.555	100	0.016	1.86904
1996-08-08	105.777	84.778	2	0.294	5.42406
1996-08-08	105.777	84.778	10	0.282
1996-08-08	105.777	84.778	20	0.276
1996-08-08	105.777	84.778	30	0.267
1996-08-08	105.777	84.778	40	0.236
1996-08-08	105.777	84.778	50	0.216	7.9145
1996-08-08	105.777	84.778	80	0.054
1996-08-08	105.777	84.778	100	0.016	2.69999
1996-08-08	109.288	85.168	2	0.436	0.990203
1996-08-08	109.288	85.168	10	0.398
1996-08-08	109.288	85.168	20	0.362
1996-08-08	109.288	85.168	30	0.302
1996-08-08	109.288	85.168	40	0.267
1996-08-08	109.288	85.168	50	0.191	3.36114
1996-08-08	109.288	85.168	80	0.044
1996-08-08	109.288	85.168	100	0.014	1.61957
1996-08-09	113.001	85.405	2	0.204	1.9449
1996-08-09	113.001	85.405	10	0.189
1996-08-09	113.001	85.405	20	0.164
1996-08-09	113.001	85.405	30	0.124
1996-08-09	113.001	85.405	40	0.122
1996-08-09	113.001	85.405	50	0.094	4.8019
1996-08-09	113.001	85.405	80	0.025
1996-08-09	113.001	85.405	100	0.011	1.8597
1996-08-10	121.455	85.86	10	0.176
1996-08-10	121.455	85.86	20	0.097
1996-08-10	121.455	85.86	30	0.093
1996-08-10	121.455	85.86	40	0.085
1996-08-10	121.455	85.86	60	0.041
1996-08-10	121.455	85.86	80	0.009
1996-08-10	121.455	85.86	100	0.005
1996-08-10	125.813	86.16	2	0.39	2.99062
1996-08-10	125.813	86.16	10	0.311
1996-08-10	125.813	86.16	20	0.184
1996-08-10	125.813	86.16	30	0.183
1996-08-10	125.813	86.16	40	0.121
1996-08-10	125.813	86.16	50	0.043	8.25406
1996-08-10	125.813	86.16	80	0.018
1996-08-10	125.813	86.16	100	0.004	1.13673
1996-08-11	134.017	86.4	2	0.669	14.4744
1996-08-11	134.017	86.4	10	0.655
1996-08-11	134.017	86.4	20	0.635
1996-08-11	134.017	86.4	30	0.516
1996-08-11	134.017	86.4	40	0.281
1996-08-11	134.017	86.4	50	0.037	1.62871
1996-08-11	134.017	86.4	80	0.005
1996-08-11	134.017	86.4	100	0.004	1.9825
1996-08-13	138.892	86.437	10	0.431	1.64286
1996-08-13	138.892	86.437	20	0.417
1996-08-13	138.892	86.437	30	0.239
1996-08-13	138.892	86.437	40	0.419	5.68312
1996-08-13	138.892	86.437	60	0.019
1996-08-13	138.892	86.437	80	0.007
1996-08-13	138.892	86.437	100	0.005	5.92434
1996-08-13	141.103	86.445	2	0.29	6.52035
1996-08-13	141.103	86.445	10	0.293
1996-08-13	141.103	86.445	20	0.266
1996-08-13	141.103	86.445	30	0.257
1996-08-13	141.103	86.445	40	0.279	3.67123
1996-08-13	141.103	86.445	60	0.319
1996-08-13	141.103	86.445	80	0.008
1996-08-13	141.103	86.445	100	0.006	2.37255
1996-08-14	143.125	86.445	10	0.295
1996-08-14	143.125	86.445	20	0.296
1996-08-14	143.125	86.445	30	0.276
1996-08-14	143.125	86.445	40	0.214
1996-08-14	143.125	86.445	60	0.041
1996-08-14	143.125	86.445	80	0.008
1996-08-14	143.125	86.445	100	0.005
1996-08-14	146.358	86.42	3	0.276	5.45155
1996-08-14	146.358	86.42	10	0.272
1996-08-14	146.358	86.42	20	0.267
1996-08-14	146.358	86.42	30	0.105
1996-08-14	146.358	86.42	40	0.202	2.45143
1996-08-14	146.358	86.42	60	0.02
1996-08-14	146.358	86.42	80	0.007
1996-08-14	146.358	86.42	100	0.005	1.04914
1996-08-14	150.83	86.322	3	0.22	5.77146
1996-08-14	150.83	86.322	10	0.218
1996-08-14	150.83	86.322	20	0.223
1996-08-14	150.83	86.322	30	0.196
1996-08-14	150.83	86.322	40	0.136
1996-08-14	150.83	86.322	50	0.081	3.0084
1996-08-14	150.83	86.322	80	0.007
1996-08-14	150.83	86.322	100	0.005	3.83828
1996-08-15	159.973	85.992	3	0.167	4.42654
1996-08-15	159.973	85.992	10	0.17
1996-08-15	159.973	85.992	20	0.17
1996-08-15	159.973	85.992	30	0.15
1996-08-15	159.973	85.992	40	0.066
1996-08-15	159.973	85.992	50	0.067	3.34624
1996-08-15	159.973	85.992	80	0.008
1996-08-15	159.973	85.992	100	0.006	4.09128
1996-08-15	161.682	85.828	3	0.212
[truncated: 4,592 more rows]
